# Supplementary material for: Adenine–adenine, adenine–cytosine and cytosine–cytosine intrastrand crosslinks induced by a photoactivatable Pt(iv) anticancer prodrug
Source: Royal Society of Chemistry journal article supplement (doi:10.1039/d3dt03351a), 2023-11-23
Supplement: d3dt03351a1.pdf [file d3dt03351a1.pdf]

**Adenine-adenine, adenine-cytosine and cytosine-cytosine crosslinks in trinucleotides induced by a photoactivatable Pt(IV) anticancer prodrug**

Jiafan Lin,<sup>1,2</sup> Jingjing Huang,<sup>1</sup> Jishuai Zhang,<sup>1,2</sup> Xinrui Qin,<sup>1</sup> Ziqi Ma, Xiaoqin Wu,<sup>1</sup>  
Fuyi wang,<sup>2,3</sup> Yao Zhao,<sup>2,3,4</sup> Kui Wu<sup>1</sup>

1. Key Laboratory of Hubei Province for Coal Conversion and New Carbon Materials; School of Chemistry and Chemical Engineering, Wuhan University of Science and Technology, Wuhan 430081, P. R. China

2. Beijing National Laboratory for Molecular Sciences; National Centre for Mass Spectrometry in Beijing; CAS Key Laboratory of Analytical Chemistry for Living Biosystems, Institute of Chemistry, Chinese Academy of Sciences, Beijing 100190, P. R. China

3. University of Chinese Academy of Sciences, Beijing 100049, P. R. China

4. State Key Laboratory of Chemo/Biosensing and Chemometrics, Hunan University, Changsha 410082, P.R. China

**Electronic Supplementary Information**

**Figure S1.** The isotopic models of major platinated adducts.

**Figure S2.** Tandem mass spectra of  $\{\mathbf{I} + \mathbf{1}'\}^+$ ,  $\{\mathbf{II} + \mathbf{1}'\}^+$ ,  $\{\mathbf{III} + \mathbf{1}'\}^+$  and  $\{\mathbf{IV} + \mathbf{1}'\}^+$

**Figure S3.** Isotopic models of some representative platinated fragments.

**Table S1.** MS data for the photo-reaction between Pt(IV) complex **1** and ODN **I**

**Table S2.** MS data for the photo-reaction between Pt(IV) complex **1** and ODN **II**

**Table S3.** MS data for the photo-reaction between Pt(IV) complex **1** and ODN **III**

**Table S4.** MS data for the photo-reaction between Pt(IV) complex **1** and ODN **IV**

**Table S5.** MS/MS data of mono-platinated **I** adduct ( $[\mathbf{I} + \mathbf{1}']^+$ )

**Table S6.** MS/MS data of mono-platinated **I** adduct ( $[\mathbf{II} + \mathbf{1}']^+$ )

**Table S7.** MS/MS data of mono-platinated **I** adduct ( $[\mathbf{III} + \mathbf{1}']^+$ )

**Table S8.** MS/MS data of mono-platinated **I** adduct ( $[\mathbf{IV} + \mathbf{1}']^+$ )

**Table S9.** MS/MS data of mono-platinated **I** adduct ( $[\mathbf{I} + \mathbf{1}'']^+$ )

**Table S10.** MS/MS data of mono-platinated **I** adduct ( $[\mathbf{II} + \mathbf{1}'']^+$ )

**Table S11.** MS/MS data of mono-platinated **I** adduct ( $[\mathbf{III} + \mathbf{1}'']^+$ )

**Table S12.** MS/MS data of mono-platinated **I** adduct ( $[\mathbf{IV} + \mathbf{1}'']^+$ )

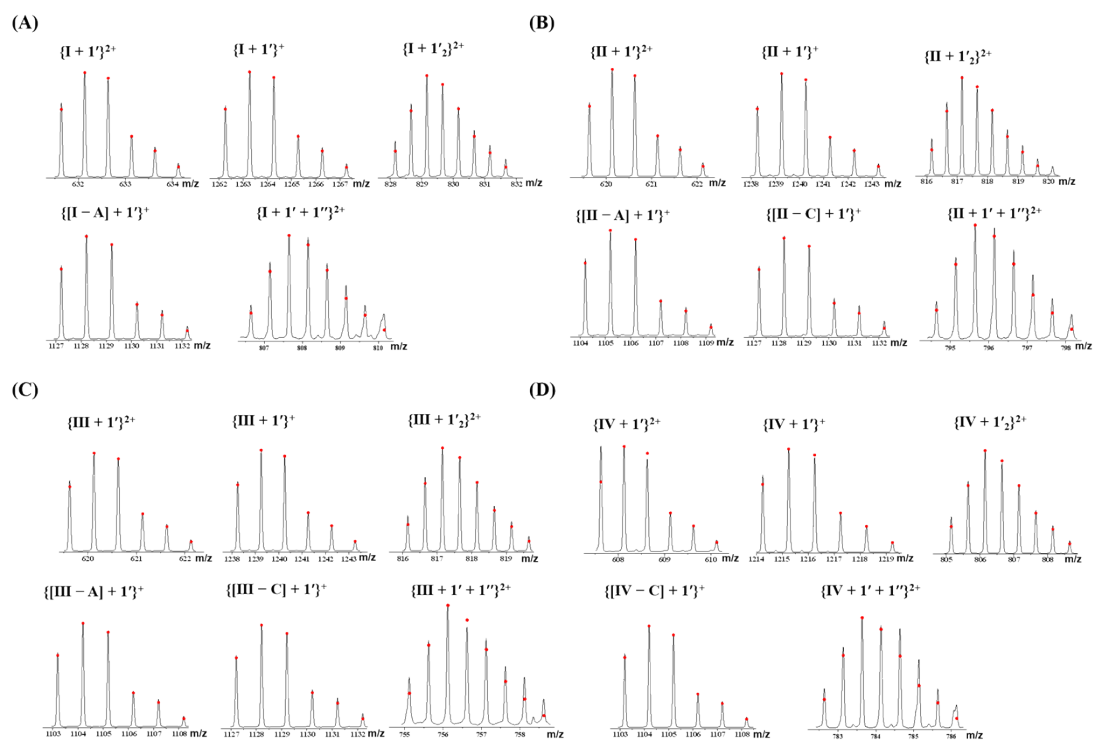

**Figure S1.** (A – D) The isotopic models (dots) and mass spectra (lines) of the major platinumated adducts under positive-ion mode arising from the reaction of complex **1** and ODN **I** (A), **II** (B), **III** (C) or **IV** (D) upon irradiation under blue light for 1 h.  $1' = [\text{Pt}(\text{N}_3)(\text{py})_2]^+$  and  $1'' = [\text{Pt}(\text{py})_2]^{2+}$ .

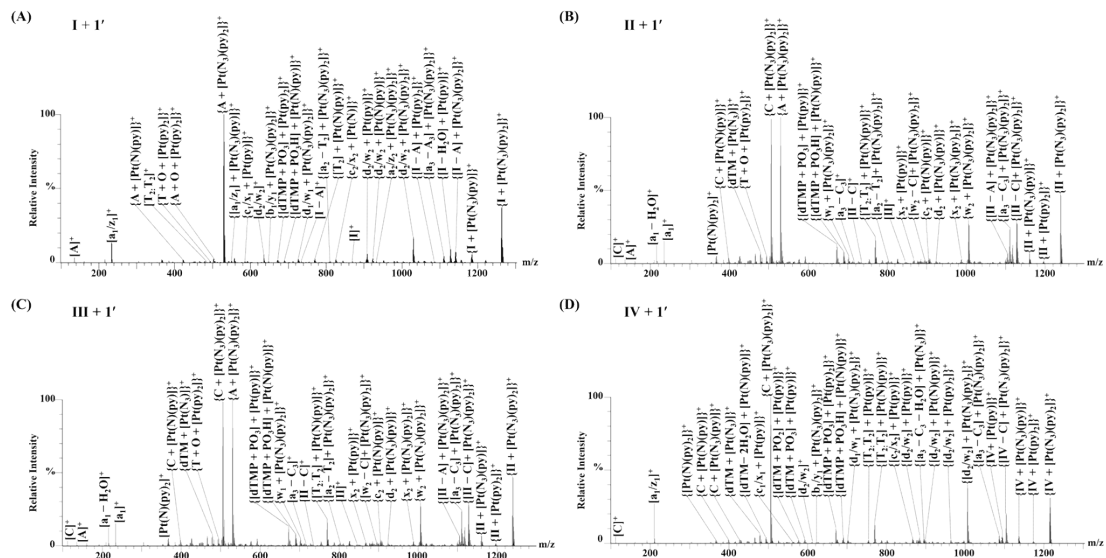

**Figure S2.** Tandem mass spectra of the parent ions  $\{I + 1'\}^+$  (A),  $\{II + 1'\}^+$  (B),  $\{III + 1'\}^+$  (C),  $\{IV + 1'\}^+$  (D) in the mass range of  $m/z$  100 – 1250 with the main peaks labeled. The corresponding MS/MS data in detail are listed in Tables S5 – S8 in the Supporting Information.  $1' = [Pt(N_3)(py)_2]^+$ .

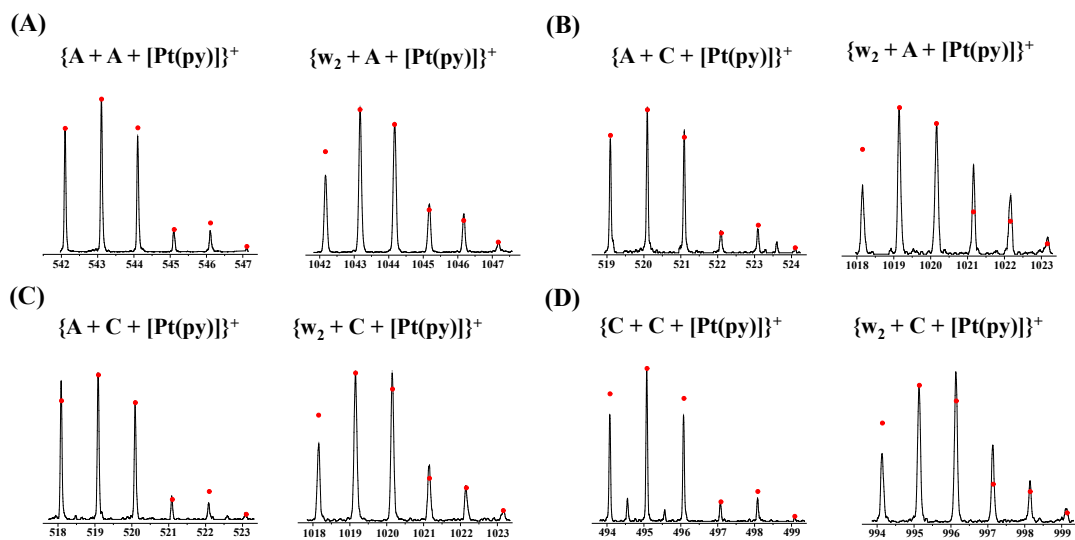

**Figure S3.** The isotopic models (dots) and mass spectra (lines) of the representative platinated fragments from the tandem mass spectrum of the parent ions  $\{I + [Pt(py)_2]\}^+$  (A),  $\{II + [Pt(py)_2]\}^+$  (B),  $\{III + [Pt(py)_2]\}^+$  (C) and  $\{IV + [Pt(py)_2]\}^+$  (D).

**Table S1.** MS data under positive-ion mode for the reaction between Pt(IV) complex **1** and ODN **I** at a molar ratio of **1/I** = 1.0 after irradiated under blue light for 1 h (Charges for Pt moiety and the loss of protons from **I** for balancing the charges of the ions are omitted for clarity). **1** = [Pt(N<sub>3</sub>)<sub>2</sub>(OH)<sub>2</sub>(Py)<sub>2</sub>].

| Ions                                                                                                | Formula                                                                                        | <i>m/z</i> <sup>a</sup> observed(calculated) |
|-----------------------------------------------------------------------------------------------------|------------------------------------------------------------------------------------------------|----------------------------------------------|
| [A] <sup>+</sup>                                                                                    | C <sub>5</sub> H <sub>5</sub> N <sub>5</sub>                                                   | 136.058(136.062)                             |
| [Pt <sup>III</sup> (OH) <sub>2</sub> (py) <sub>2</sub> ] <sup>+</sup>                               | C <sub>10</sub> H <sub>11</sub> N <sub>2</sub> O <sub>2</sub> Pt                               | 387.055(387.054)                             |
| [ <b>I</b> ] <sup>2+</sup>                                                                          | C <sub>30</sub> H <sub>38</sub> N <sub>12</sub> O <sub>15</sub> P <sub>2</sub>                 | 435.106(435.110)                             |
| [Pt <sup>IV</sup> (N <sub>3</sub> ) <sub>2</sub> (OH) <sub>2</sub> (py) <sub>2</sub> ] <sup>+</sup> | C <sub>10</sub> H <sub>14</sub> O <sub>2</sub> N <sub>8</sub> Pt                               | 474.096(474.096)                             |
| {A + [Pt(N <sub>3</sub> )(py) <sub>2</sub> ]} <sup>+</sup>                                          | C <sub>15</sub> H <sub>14</sub> N <sub>10</sub> Pt                                             | 530.108(530.112)                             |
| { <b>I</b> + [Pt(py) <sub>2</sub> ]} <sup>2+</sup>                                                  | C <sub>40</sub> H <sub>46</sub> N <sub>14</sub> O <sub>15</sub> P <sub>2</sub> Pt              | 610.625(610.627)                             |
| { <b>I</b> + [Pt(N <sub>3</sub> )(py) <sub>2</sub> ]} <sup>2+</sup>                                 | C <sub>40</sub> H <sub>47</sub> N <sub>17</sub> O <sub>15</sub> P <sub>2</sub> Pt              | 632.133(632.135)                             |
| [ <b>I</b> – A <sup>b</sup> ] <sup>+</sup>                                                          | C <sub>25</sub> H <sub>33</sub> N <sub>7</sub> O <sub>15</sub> P <sub>2</sub>                  | 734.155(734.158)                             |
| { <b>I</b> + [Pt(N <sub>3</sub> )(py) <sub>2</sub> ] + [Pt(py) <sub>2</sub> ]} <sup>2+</sup>        | C <sub>50</sub> H <sub>55</sub> N <sub>19</sub> O <sub>15</sub> P <sub>2</sub> Pt <sub>2</sub> | 807.654(807.652)                             |
| { <b>I</b> + [Pt(N <sub>3</sub> )(py) <sub>2</sub> ] <sub>2</sub> } <sup>2+</sup>                   | C <sub>50</sub> H <sub>56</sub> N <sub>22</sub> O <sub>15</sub> P <sub>2</sub> Pt <sub>2</sub> | 829.163(829.160)                             |
| [ <b>I</b> ] <sup>+</sup>                                                                           | C <sub>30</sub> H <sub>38</sub> N <sub>12</sub> O <sub>15</sub> P <sub>2</sub>                 | 869.213(869.213)                             |
| {[ <b>I</b> ] <sub>2</sub> + K} <sup>2+</sup>                                                       | C <sub>60</sub> H <sub>75</sub> N <sub>24</sub> O <sub>30</sub> P <sub>4</sub> K               | 888.191(888.191)                             |
| {d <sub>2</sub> /w <sub>2</sub> + [Pt(N <sub>3</sub> )(py) <sub>2</sub> ]} <sup>+</sup>             | C <sub>30</sub> H <sub>36</sub> N <sub>12</sub> O <sub>13</sub> P <sub>2</sub> Pt              | 1030.178(1030.172_                           |
| {[ <b>I</b> ] <sub>2</sub> + [Pt(N <sub>3</sub> )(py) <sub>2</sub> ] + K} <sup>2+</sup>             | C <sub>70</sub> H <sub>84</sub> N <sub>29</sub> O <sub>30</sub> P <sub>4</sub> PtK             | 1085.717(1085.717)                           |
| {[ <b>I</b> – A <sup>b</sup> ] + [Pt(N <sub>3</sub> )(py) <sub>2</sub> ]} <sup>+</sup>              | C <sub>35</sub> H <sub>42</sub> N <sub>12</sub> O <sub>15</sub> P <sub>2</sub> Pt              | 1128.215(1128.209)                           |
| { <b>I</b> + [Pt(py) <sub>2</sub> ]} <sup>+</sup>                                                   | C <sub>40</sub> H <sub>46</sub> N <sub>14</sub> O <sub>15</sub> P <sub>2</sub> Pt              | 1220.253(1220.246)                           |
| { <b>I</b> + [Pt(N <sub>3</sub> )(py) <sub>2</sub> ]} <sup>+</sup>                                  | C <sub>40</sub> H <sub>47</sub> N <sub>17</sub> O <sub>15</sub> P <sub>2</sub> Pt              | 1263.271(1263.264)                           |

<sup>a</sup>The most abundant isotopic mass-to-charge ratio.

<sup>b</sup>A represent the neutral loss of an adenine.

**Table S2.** MS data under positive-ion mode for the reaction between Pt(IV) complex **1** and ODN **II** at a molar ratio of  $1/II = 1.0$  after irradiated under blue light for 1 h (Charges for Pt moiety and the loss of protons from **II** for balancing the charges of the ions are omitted for clarity). **1** = [Pt(N<sub>3</sub>)<sub>2</sub>(OH)<sub>2</sub>(Py)<sub>2</sub>].

| Ions                                                                                                | Formula                                                                                        | <i>m/z</i> <sup>a</sup> observed(calculated) |
|-----------------------------------------------------------------------------------------------------|------------------------------------------------------------------------------------------------|----------------------------------------------|
| [A] <sup>+</sup>                                                                                    | C <sub>5</sub> H <sub>5</sub> N <sub>5</sub>                                                   | 136.058(136.062)                             |
| [Pt <sup>III</sup> (OH) <sub>2</sub> (py) <sub>2</sub> ] <sup>+</sup>                               | C <sub>10</sub> H <sub>11</sub> N <sub>2</sub> O <sub>2</sub> Pt                               | 387.049(387.054)                             |
| [Pt <sup>IV</sup> (N <sub>3</sub> ) <sub>2</sub> (OH) <sub>2</sub> (py) <sub>2</sub> ] <sup>+</sup> | C <sub>10</sub> H <sub>14</sub> N <sub>8</sub> O <sub>2</sub> Pt                               | 474.095(474.096)                             |
| {C + [Pt(N <sub>3</sub> )(py) <sub>2</sub> ] <sup>+</sup>                                           | C <sub>14</sub> H <sub>14</sub> N <sub>8</sub> OPt                                             | 506.100(506.101)                             |
| {A + [Pt(N <sub>3</sub> )(py) <sub>2</sub> ] <sup>+</sup>                                           | C <sub>15</sub> H <sub>14</sub> N <sub>10</sub> Pt                                             | 530.111(530.112)                             |
| {II + [Pt(py) <sub>2</sub> ] <sup>2+</sup>                                                          | C <sub>39</sub> H <sub>46</sub> N <sub>12</sub> O <sub>16</sub> P <sub>2</sub> Pt              | 598.618(598.621)                             |
| {II + [Pt(N <sub>3</sub> )(py) <sub>2</sub> ] <sup>2+</sup>                                         | C <sub>39</sub> H <sub>47</sub> N <sub>15</sub> O <sub>16</sub> P <sub>2</sub> Pt              | 620.130(620.130)                             |
| [II – C <sup>b</sup> ] <sup>+</sup>                                                                 | C <sub>25</sub> H <sub>33</sub> N <sub>7</sub> O <sub>15</sub> P <sub>2</sub>                  | 734.158(734.158)                             |
| {II + [Pt(N <sub>3</sub> )(py) <sub>2</sub> ] + [Pt(py) <sub>2</sub> ] <sup>2+</sup>                | C <sub>49</sub> H <sub>55</sub> N <sub>17</sub> O <sub>16</sub> P <sub>2</sub> Pt <sub>2</sub> | 795.643(795.646)                             |
| {II + [Pt(N <sub>3</sub> )(py) <sub>2</sub> ] <sub>2</sub> <sup>2+</sup>                            | C <sub>49</sub> H <sub>56</sub> N <sub>20</sub> O <sub>16</sub> P <sub>2</sub> Pt <sub>2</sub> | 817.156(817.155)                             |
| [III] <sup>+</sup>                                                                                  | C <sub>29</sub> H <sub>38</sub> N <sub>10</sub> O <sub>16</sub> P <sub>2</sub>                 | 845.202(845.202)                             |
| {w <sub>2</sub> + [Pt(N <sub>3</sub> )(py) <sub>2</sub> ] <sup>+</sup>                              | C <sub>29</sub> H <sub>36</sub> N <sub>10</sub> O <sub>14</sub> P <sub>2</sub> Pt              | 1006.166(1006.161)                           |
| {[III] <sub>2</sub> + [Pt(py) <sub>2</sub> ] <sup>2+</sup>                                          | C <sub>68</sub> H <sub>84</sub> N <sub>22</sub> O <sub>32</sub> P <sub>4</sub> Pt              | 1021.222(1021.219)                           |
| {[III] <sub>2</sub> + [Pt(N <sub>3</sub> )(py) <sub>2</sub> ] <sup>2+</sup>                         | C <sub>68</sub> H <sub>85</sub> N <sub>25</sub> O <sub>32</sub> P <sub>4</sub> Pt              | 1042.729(1042.728)                           |
| {[II – A <sup>b</sup> ] + [Pt(N <sub>3</sub> )(py) <sub>2</sub> ] <sup>+</sup>                      | C <sub>34</sub> H <sub>42</sub> N <sub>10</sub> O <sub>16</sub> P <sub>2</sub> Pt              | 1104.198(1104.202)                           |
| {[II – C <sup>b</sup> ] + [Pt(N <sub>3</sub> )(py) <sub>2</sub> ] <sup>+</sup>                      | C <sub>35</sub> H <sub>42</sub> N <sub>12</sub> O <sub>15</sub> P <sub>2</sub> Pt              | 1128.212 (1128.209)                          |
| {II + [Pt(py) <sub>2</sub> ] <sup>+</sup>                                                           | C <sub>39</sub> H <sub>46</sub> N <sub>12</sub> O <sub>16</sub> P <sub>2</sub> Pt              | 1196.245(1196.235)                           |
| {II + [Pt(N <sub>3</sub> )(py) <sub>2</sub> ] <sup>+</sup>                                          | C <sub>39</sub> H <sub>47</sub> N <sub>15</sub> O <sub>16</sub> P <sub>2</sub> Pt              | 1239.260(1239.252)                           |
| [III] <sub>3</sub> <sup>2+</sup>                                                                    | C <sub>87</sub> H <sub>114</sub> N <sub>30</sub> O <sub>48</sub> P <sub>6</sub>                | 1267.807(1267.800)                           |

<sup>a</sup>The most abundant isotopic mass-to-charge ratio.

<sup>b</sup>A and C represent the neutral loss of an adenine and a cytosine base, respectively.

**Table S3.** MS data under positive-ion mode for the reaction between Pt(IV) complex **1** and ODN **III** at a molar ratio of **1/III** = 1.0 after irradiated under blue light for 1 h (Charges for Pt moiety and the loss of protons from **III** for balancing the charges of the ions are omitted for clarity). **1** = [Pt(N<sub>3</sub>)<sub>2</sub>(OH)<sub>2</sub>(Py)<sub>2</sub>].

| Ions                                                                                                | Formula                                                                                        | <i>m/z</i> <sup>a</sup> observed(calculated) |
|-----------------------------------------------------------------------------------------------------|------------------------------------------------------------------------------------------------|----------------------------------------------|
| [C] <sup>+</sup>                                                                                    | C <sub>4</sub> H <sub>5</sub> N <sub>3</sub> O                                                 | 112.056(112.051)                             |
| [A] <sup>+</sup>                                                                                    | C <sub>5</sub> H <sub>5</sub> N <sub>5</sub>                                                   | 136.058(136.062)                             |
| [Pt <sup>III</sup> (OH) <sub>2</sub> (py) <sub>2</sub> ] <sup>+</sup>                               | C <sub>10</sub> H <sub>11</sub> N <sub>2</sub> O <sub>2</sub> Pt                               | 387.049(387.054)                             |
| [Pt <sup>IV</sup> (N <sub>3</sub> ) <sub>2</sub> (OH) <sub>2</sub> (py) <sub>2</sub> ] <sup>+</sup> | C <sub>10</sub> H <sub>14</sub> N <sub>8</sub> O <sub>2</sub> Pt                               | 474.095(474.096)                             |
| [C + [Pt(N <sub>3</sub> )(py) <sub>2</sub> ]] <sup>+</sup>                                          | C <sub>14</sub> H <sub>14</sub> N <sub>8</sub> OPt                                             | 506.095(506.101)                             |
| { <b>III</b> + [Pt(py) <sub>2</sub> ]} <sup>2+</sup>                                                | C <sub>39</sub> H <sub>46</sub> N <sub>12</sub> O <sub>16</sub> P <sub>2</sub> Pt              | 598.618(598.621)                             |
| { <b>III</b> + [Pt(N <sub>3</sub> )(py) <sub>2</sub> ]} <sup>2+</sup>                               | C <sub>39</sub> H <sub>47</sub> N <sub>15</sub> O <sub>16</sub> P <sub>2</sub> Pt              | 620.124(620.130)                             |
| [w <sub>2</sub> ] <sup>+</sup>                                                                      | C <sub>20</sub> H <sub>27</sub> N <sub>7</sub> O <sub>13</sub> P <sub>2</sub>                  | 636.118(636.121)                             |
| [ <b>III</b> - C <sup>b</sup> ] <sup>+</sup>                                                        | C <sub>25</sub> H <sub>33</sub> N <sub>7</sub> O <sub>15</sub> P <sub>2</sub>                  | 734.153(734.158)                             |
| { <b>III</b> + [Pt(N <sub>3</sub> )(py) <sub>2</sub> ] + [Pt(py) <sub>2</sub> ]} <sup>2+</sup>      | C <sub>49</sub> H <sub>55</sub> N <sub>17</sub> O <sub>16</sub> P <sub>2</sub> Pt <sub>2</sub> | 795.643(795.646)                             |
| { <b>III</b> + [Pt(N <sub>3</sub> )(py) <sub>2</sub> ] <sub>2</sub> } <sup>2+</sup>                 | C <sub>49</sub> H <sub>56</sub> N <sub>20</sub> O <sub>16</sub> P <sub>2</sub> Pt <sub>2</sub> | 817.150(817.155)                             |
| [ <b>III</b> ] <sup>+</sup>                                                                         | C <sub>29</sub> H <sub>38</sub> N <sub>10</sub> O <sub>16</sub> P <sub>2</sub>                 | 845.202(845.202)                             |
| {w <sub>2</sub> + [Pt(N <sub>3</sub> )(py) <sub>2</sub> ]} <sup>+</sup>                             | C <sub>30</sub> H <sub>36</sub> N <sub>12</sub> O <sub>13</sub> P <sub>2</sub> Pt              | 1030.175(1030.172)                           |
| {[ <b>III</b> - A <sup>b</sup> ] + [Pt(N <sub>3</sub> )(py) <sub>2</sub> ]} <sup>+</sup>            | C <sub>34</sub> H <sub>42</sub> N <sub>10</sub> O <sub>16</sub> P <sub>2</sub> Pt              | 1104.202(1104.198)                           |
| {[ <b>III</b> - C <sup>b</sup> ] + [Pt(N <sub>3</sub> )(py) <sub>2</sub> ]} <sup>+</sup>            | C <sub>35</sub> H <sub>42</sub> N <sub>12</sub> O <sub>15</sub> P <sub>2</sub> Pt              | 1128.205(1128.209)                           |
| { <b>III</b> + [Pt(py) <sub>2</sub> ]} <sup>+</sup>                                                 | C <sub>39</sub> H <sub>46</sub> N <sub>12</sub> O <sub>16</sub> P <sub>2</sub> Pt              | 1196.231(1196.235)                           |
| { <b>III</b> + [Pt(N <sub>3</sub> )(py) <sub>2</sub> ]} <sup>+</sup>                                | C <sub>39</sub> H <sub>47</sub> N <sub>15</sub> O <sub>16</sub> P <sub>2</sub> Pt              | 1239.253(1239.252)                           |

<sup>a</sup>The most abundant isotopic mass-to-charge ratio.

<sup>b</sup>A and C represent the neutral loss of an adenine and a cytosine base, respectively.



**Table S4.** MS data under positive-ion mode for the reaction between Pt(IV) complex **1** and ODN **IV** at a molar ratio of  $1/IV = 1.0$  after irradiated under blue light for 1 h (Charges for Pt moiety and the loss of protons from **IV** for balancing the charges of the ions are omitted for clarity). **1** =  $[Pt(N_3)_2(OH)_2(Py)_2]$ .

| Ions                                         | Formula                           | $m/z^a$ observed(calculated) |
|----------------------------------------------|-----------------------------------|------------------------------|
| $[Pt^{III}(OH)_2(py)_2]^+$                   | $C_{10}H_{11}N_2O_2Pt$            | 387.049(387.054)             |
| $[Pt^{IV}(N_3)_2(OH)_2(py)_2]^+$             | $C_{10}H_{14}N_8O_2Pt$            | 474.095(474.096)             |
| $[T_2:T_2^c]^+$                              | $C_{15}H_{20}N_2O_{12}P_2$        | 483.051(483.056)             |
| $\{C + [Pt(N_3)(py)_2]\}^+$                  | $C_{14}H_{14}N_8OPt$              | 506.096(506.101)             |
| $\{IV + [Pt(py)_2]\}^{2+}$                   | $C_{38}H_{46}N_{10}O_{17}P_2Pt$   | 586.614(586.616)             |
| $\{IV + [Pt(N_3)(py)_2]\}^{2+}$              | $C_{38}H_{47}N_{13}O_{17}P_2Pt$   | 608.122(608.124)             |
| $[IV - C^b]^+$                               | $C_{24}H_{33}N_5O_{16}P_2$        | 710.147(710.147)             |
| $\{IV + [Pt(N_3)(py)_2] + [Pt(py)_2]\}^{2+}$ | $C_{48}H_{55}N_{15}O_{17}P_2Pt_2$ | 783.639(783.641)             |
| $\{IV + [Pt(N_3)(py)_2]_2\}^{2+}$            | $C_{48}H_{56}N_{18}O_{17}P_2Pt_2$ | 805.147(805.149)             |
| $[IV]^+$                                     | $C_{28}H_{38}N_8O_{17}P_2$        | 821.190(821.190)             |
| $\{[d_2/w_2] + [Pt(N_3)(py)_2]\}^+$          | $C_{29}H_{36}N_{10}O_{14}P_2Pt$   | 1006.160(1006.161)           |
| $\{[IV - C^b] + [Pt(py)_2]\}^+$              | $C_{34}H_{41}N_7O_{16}P_2Pt$      | 1061.184(1061.181)           |
| $\{[IV - C^b] + [Pt(N_3)(py)_2]\}^+$         | $C_{34}H_{42}N_{10}O_{16}P_2Pt$   | 1104.203(1104.198)           |
| $\{IV + [Pt(py)_2]\}^+$                      | $C_{38}H_{46}N_{10}O_{17}P_2Pt$   | 1172.228(1172.224)           |
| $\{IV + [Pt(N_3)(py)_2]\}^+$                 | $C_{38}H_{47}N_{13}O_{17}P_2Pt$   | 1215.249(1215.254)           |

<sup>a</sup>The most abundant isotopic mass-to-charge ratio.

<sup>b</sup>C represent the neutral loss of a cytosine base.

<sup>c</sup>The internal fragment  $B_m:B_n$  results from fragmentation at both the a- and w-sites, having a phosphate group at their 5'-terminus and a furan ring at the 3'-terminus.

**Table S5.** Fragment ions observed by MS/MS analysis in positive-ion mode of mono-platinated **I** ( $[\mathbf{I} + \mathbf{1}']^+$ ) produced by the reaction of complex **1** with ODN **I** at 310 K after irradiation under blue light for 1 h. (Charges for Pt moiety and the loss of protons from **I** for balancing the charges of the ions are omitted for clarity).  $\mathbf{1}' = [\text{Pt}(\text{N}_3)(\text{py})_2]^{2+}$

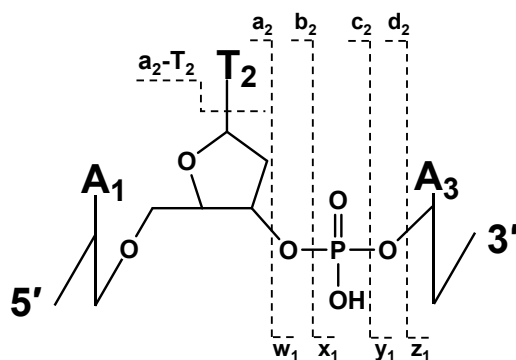

| Ions                                                                     | Formula                                                       | $m/z^a$ observed(calculated) |
|--------------------------------------------------------------------------|---------------------------------------------------------------|------------------------------|
| $[\mathbf{A}]^+$                                                         | $\text{C}_5\text{H}_5\text{N}_5$                              | 136.055(136.062)             |
| $[\mathbf{a}_1/\mathbf{z}_1 - \text{H}_2\text{O}]^+$                     | $\text{C}_{10}\text{H}_9\text{N}_5\text{O}$                   | 216.084(216.088)             |
| $[\mathbf{a}_1/\mathbf{z}_1]^+$                                          | $\text{C}_{10}\text{H}_{11}\text{N}_5\text{O}_2$              | 234.093(234.099)             |
| $[\text{Pt}(\text{N}_3)(\text{py})_2]^+$                                 | $\text{C}_{10}\text{H}_9\text{N}_5\text{Pt}$                  | 395.053(395.058)             |
| $\{\mathbf{A} + [\text{Pt}(\text{N})(\text{py})]\}^+$                    | $\text{C}_{10}\text{H}_9\text{N}_7\text{Pt}$                  | 423.054(423.064)             |
| $\{\text{dTMe}^e + [\text{Pt}(\text{N}_3)]\}^+$                          | $\text{C}_{10}\text{H}_{13}\text{N}_5\text{O}_5\text{Pt}$     | 479.077(479.064)             |
| $[\mathbf{T}_2:\mathbf{T}_2^d]^+$                                        | $\text{C}_{15}\text{H}_{20}\text{N}_2\text{O}_{12}\text{P}_2$ | 483.052(483.056)             |
| $\{\mathbf{A} + [\text{Pt}(\text{N}_3)(\text{py})_2]\}^+$                | $\text{C}_{15}\text{H}_{14}\text{N}_{10}\text{Pt}$            | 530.102(530.112)             |
| $\{\mathbf{A} + \mathbf{A} + [\text{Pt}(\text{N}_3)(\text{py})]\}^+$     | $\text{C}_{15}\text{H}_{13}\text{N}_{11}\text{Pt}$            | 543.102(543.108)             |
| $\{[\mathbf{a}_1/\mathbf{z}_1] + [\text{Pt}(\text{N}_3)(\text{py})]\}^+$ | $\text{C}_{15}\text{H}_{15}\text{N}_9\text{O}_2\text{Pt}$     | 550.089(550.107)             |
| $\{\mathbf{A} + \mathbf{A} + [\text{Pt}(\text{N})(\text{py})]\}^+$       | $\text{C}_{15}\text{H}_{14}\text{N}_{12}\text{Pt}$            | 558.114(558.118)             |
| $\{[\text{dTMe}^e + \text{PO}_2] + [\text{Pt}(\text{py})]\}^+$           | $\text{C}_{15}\text{H}_{16}\text{N}_3\text{O}_7\text{PPt}$    | 577.041(577.045)             |
| $\{\mathbf{c}_1/\mathbf{x}_1 + [\text{Pt}(\text{py})]\}^+$               | $\text{C}_{15}\text{H}_{15}\text{N}_6\text{O}_5\text{PPt}$    | 586.059(586.056)             |
| $\{[\text{dTMe}^e + \text{PO}_2] + [\text{Pt}(\text{N})(\text{py})]\}^+$ | $\text{C}_{15}\text{H}_{17}\text{N}_4\text{O}_7\text{PPt}$    | 592.049(592.056)             |
| $\{\mathbf{c}_1/\mathbf{x}_1 + [\text{Pt}(\text{N})(\text{py})]\}^+$     | $\text{C}_{15}\text{H}_{16}\text{N}_7\text{O}_5\text{PPt}$    | 601.061(601.067)             |
| $\{\mathbf{d}_1/\mathbf{w}_1 + [\text{Pt}(\text{N})(\text{py})]\}^+$     | $\text{C}_{15}\text{H}_{18}\text{N}_7\text{O}_6\text{PPt}$    | 619.066(619.078)             |
| $[\mathbf{d}_2/\mathbf{w}_2]^+$                                          | $\text{C}_{20}\text{H}_{27}\text{N}_7\text{O}_{13}\text{P}_2$ | 636.120(636.121)             |
| $\{\mathbf{b}_1/\mathbf{y}_1 + [\text{Pt}(\text{N}_3)(\text{py})_2]\}^+$ | $\text{C}_{20}\text{H}_{22}\text{N}_{10}\text{O}_3\text{Pt}$  | 646.154(646.160)             |

|                                         |                                 |                    |
|-----------------------------------------|---------------------------------|--------------------|
| $\{[dTMP^e + PO_3] + [Pt(py)]\}^+$      | $C_{20}H_{21}N_4O_8PPt$         | 672.081(672.082)   |
| $\{[dTMP^e + PO_3H] + [Pt(N)(py)]\}^+$  | $C_{15}H_{20}N_4O_{11}P_2Pt$    | 690.033(690.028)   |
| $\{c_1/x_1 + T + [Pt(py)]\}^+$          | $C_{20}H_{21}N_8O_7PPt$         | 712.087(712.099)   |
| $\{d_1/w_1 + [Pt(N_3)(py)_2]\}^+$       | $C_{20}H_{23}N_{10}O_6PPt$      | 726.119(726.126)   |
| $[I - A^b]^+$                           | $C_{25}H_{33}N_7O_{15}P_2$      | 734.155(734.158)   |
| $\{[T_2:T_2^d] + [Pt(py)]\}^+$          | $C_{20}H_{23}N_3O_{12}P_2Pt$    | 755.050(755.048)   |
| $\{[T_2:T_2^d] + [Pt(N)(py)]\}^+$       | $C_{20}H_{24}N_4O_{12}P_2Pt$    | 770.054(770.059)   |
| $\{[a_2 - T_2^c] + [Pt(N_3)(py)_2]\}^+$ | $C_{25}H_{27}N_{10}O_7PPt$      | 806.154(806.152)   |
| $\{c_2/x_2 + [Pt(N)]\}^+$               | $C_{20}H_{24}N_8O_{12}P_2Pt$    | 826.076(829.071)   |
| $\{d_2/w_2 + [Pt(N)]\}^+$               | $C_{20}H_{26}N_8O_{13}P_2Pt$    | 844.082(844.072)   |
| $[I]^+$                                 | $C_{30}H_{38}N_{12}O_{15}P_2$   | 869.213(869.213)   |
| $\{[T_2:T_2^d] + [Pt(N_3)(py)_2]\}^+$   | $C_{25}H_{29}N_7O_{12}P_2Pt$    | 877.123(877.107)   |
| $\{c_2/x_2 + [Pt(py)]\}^+$              | $C_{25}H_{28}N_8O_{12}P_2Pt$    | 890.103(890.102)   |
| $\{c_2/x_2 + [Pt(N)(py)]\}^+$           | $C_{25}H_{29}N_9O_{12}P_2Pt$    | 905.118(905.113)   |
| $\{d_2/w_2 + [Pt(py)]\}^+$              | $C_{25}H_{30}N_8O_{13}P_2Pt$    | 908.115(908.113)   |
| $\{d_2/w_2 + [Pt(N)(py)]\}^+$           | $C_{25}H_{31}N_9O_{13}P_2Pt$    | 923.125(923.124)   |
| $\{a_2/z_2 + [Pt(N_3)(py)_2]\}^+$       | $C_{30}H_{33}N_{12}O_9PPt$      | 932.201(932.195)   |
| $\{d_2/w_2 + [Pt(N_3)(py)]\}^+$         | $C_{25}H_{31}N_{11}O_{13}P_2Pt$ | 951.130(951.130)   |
| $\{[I - T^b] + [Pt(N_3)]\}^+$           | $C_{25}H_{31}N_{13}O_{13}P_2Pt$ | 979.136(979.138)   |
| $\{d_2/w_2 + [Pt(py)_2]\}^+$            | $C_{30}H_{35}N_9O_{13}P_2Pt$    | 987.153(987.155)   |
| $\{d_2/w_2 + [Pt(N)(py)_2]\}^+$         | $C_{30}H_{36}N_{10}O_{13}P_2Pt$ | 1002.159(1002.166) |
| $\{c_2/x_2 + [Pt(N_3)(py)_2]\}^+$       | $C_{30}H_{34}N_{12}O_{12}P_2Pt$ | 1012.151(1012.167) |
| $\{d_2/w_2 + [Pt(N_3)(py)_2]\}^+$       | $C_{30}H_{36}N_{12}O_{13}P_2Pt$ | 1030.172(1030.172) |
| $\{[I - T^b] + [Pt(N_3)(py)]\}^+$       | $C_{30}H_{36}N_{14}O_{13}P_2Pt$ | 1058.179(1058.178) |
| $\{[a_3 - A_3^c] + [Pt(py)_2]\}^+$      | $C_{35}H_{39}N_9O_{14}P_2Pt$    | 1067.185(1067.182) |
| $[I + [Pt(N)]]^+$                       | $C_{30}H_{37}N_{13}O_{15}P_2Pt$ | 1077.171(1077.173) |
| $\{[I - A^b] + [Pt(py)_2]\}^+$          | $C_{35}H_{41}N_9O_{15}P_2Pt$    | 1085.184(1085.192) |
| $\{[a_3 - A_3^c] + [Pt(N_3)(py)_2]\}^+$ | $C_{35}H_{40}N_{12}O_{14}P_2Pt$ | 1110.195(1110.198) |
| $\{[I - H_2O] + [Pt(py)]\}^+$           | $C_{35}H_{39}N_{13}O_{14}P_2Pt$ | 1123.185(1123.194) |
| $\{[I - A^b] + [Pt(N_3)(py)_2]\}^+$     | $C_{35}H_{42}N_{12}O_{15}P_2Pt$ | 1128.215(1128.209) |

|                                                                                |                                                                           |                    |
|--------------------------------------------------------------------------------|---------------------------------------------------------------------------|--------------------|
| $\{\mathbf{I} + [\text{Pt}(\text{py})]\}^+$                                    | $\text{C}_{35}\text{H}_{41}\text{N}_{13}\text{O}_{15}\text{P}_2\text{Pt}$ | 1141.206(1141.204) |
| $\{\mathbf{I} + [\text{Pt}(\text{N})(\text{py})]\}^+$                          | $\text{C}_{35}\text{H}_{42}\text{N}_{14}\text{O}_{15}\text{P}_2\text{Pt}$ | 1156.220(1156.215) |
| $\{[\mathbf{I} - \text{H}_2\text{O}] + [\text{Pt}(\text{N}_3)(\text{py})]\}^+$ | $\text{C}_{35}\text{H}_{40}\text{N}_{16}\text{O}_{14}\text{P}_2\text{Pt}$ | 1166.235(1166.211) |
| $\{\mathbf{I} + [\text{Pt}(\text{N}_3)(\text{py})]\}^+$                        | $\text{C}_{35}\text{H}_{42}\text{N}_{16}\text{O}_{15}\text{P}_2\text{Pt}$ | 1185.230(1185.221) |
| $\{\mathbf{I} + [\text{Pt}(\text{py})_2]\}^+$                                  | $\text{C}_{40}\text{H}_{46}\text{N}_{14}\text{O}_{15}\text{P}_2\text{Pt}$ | 1220.260(1220.246) |
| $\{\mathbf{I} + [\text{Pt}(\text{N}_3)(\text{py})_2]\}^+$                      | $\text{C}_{40}\text{H}_{47}\text{N}_{17}\text{O}_{15}\text{P}_2\text{Pt}$ | 1263.264(1263.264) |

<sup>a</sup>The most abundant isotopic mass-to-charge ratio.

<sup>b</sup>A and T represent the neutral loss of an adenine and a thymine base, respectively.

<sup>c</sup>T<sub>n</sub> and A<sub>n</sub> represent the loss of a thymine or an adenine base, followed by elimination of a H<sub>2</sub>O molecule to form a furan ring, n indicates the position of the base in strand **I**.

<sup>d</sup>The internal fragment B<sub>m</sub>:B<sub>n</sub> results from fragmentation at both the a- and w-sites, having a phosphate group at their 5'-terminus and a furan ring at the 3'-terminus.

<sup>e</sup>dTM and dTMP represent the thymidine and thymidine monophosphate, respectively.

**Table S6.** Fragment ions observed by MS/MS analysis in positive-ion mode of mono-platinated **II** ( $[\mathbf{II} + \mathbf{1}']^+$ ) produced by the reaction of complex **1** with ODN **II** at 310 K after irradiation under blue light for 1 h. (Charges for Pt moiety and the loss of protons from **II** for balancing the charges of the ions are omitted for clarity).  $\mathbf{1}' = [\text{Pt}(\text{N}_3)(\text{py})_2]^+$

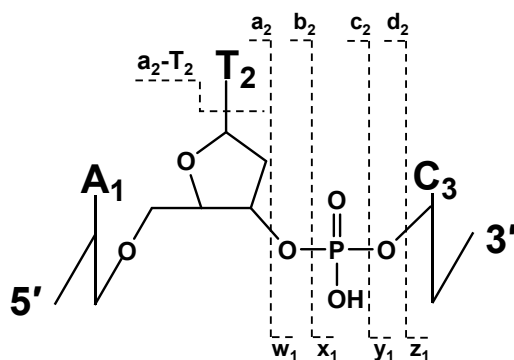

| Ions                                                                             | Formula                                                                | $m/z^a$ observed(calculated) |
|----------------------------------------------------------------------------------|------------------------------------------------------------------------|------------------------------|
| $[\text{C}]^+$                                                                   | $\text{C}_4\text{H}_5\text{N}_3\text{O}$                               | 112.045(112.051)             |
| $[\text{A}]^+$                                                                   | $\text{C}_5\text{H}_5\text{N}_5$                                       | 136.057(136.062)             |
| $[\text{a}_1 - \text{H}_2\text{O}]^+$                                            | $\text{C}_{10}\text{H}_9\text{N}_5\text{O}$                            | 216.082(216.088)             |
| $[\text{a}_1]^+$                                                                 | $\text{C}_{10}\text{H}_{11}\text{N}_5\text{O}_2$                       | 234.094(234.099)             |
| $[\text{Pt}(\text{N})(\text{py})_2]^+$                                           | $\text{C}_{10}\text{H}_9\text{N}_3\text{Pt}$                           | 367.037(367.052)             |
| $\{\text{C} + [\text{Pt}(\text{N})(\text{py})]\}^+$                              | $\text{C}_9\text{H}_9\text{N}_5\text{OPt}$                             | 399.048(399.053)             |
| $\{\text{C} + [\text{Pt}(\text{N}_3)(\text{py})]\}^+$                            | $\text{C}_9\text{H}_9\text{N}_7\text{OPt}$                             | 427.052(427.059)             |
| $\{\text{dTMe}^e + [\text{Pt}(\text{N}_3)]\}^+$                                  | $\text{C}_{10}\text{H}_{13}\text{N}_5\text{O}_5\text{Pt}$              | 479.072(479.64)              |
| $\{\text{C} + [\text{Pt}(\text{N}_3)(\text{py})_2]\}^+$                          | $\text{C}_{14}\text{H}_{14}\text{N}_8\text{OPt}$                       | 506.092(506.101)             |
| $\{\text{A} + [\text{Pt}(\text{N}_3)(\text{py})_2]\}^+$                          | $\text{C}_{15}\text{H}_{14}\text{N}_{10}\text{Pt}$                     | 530.108(530.112)             |
| $\{[\text{dTMe}^e + \text{PO}_2] + [\text{Pt}(\text{py})]\}^+$                   | $\text{C}_{15}\text{H}_{16}\text{N}_3\text{O}_7\text{PPt}$             | 577.040(577.045)             |
| $\{[\text{dTMe}^e + \text{PO}_3] + [\text{Pt}(\text{py})]\}^+$                   | $\text{C}_{15}\text{H}_{16}\text{N}_3\text{O}_8\text{PPt}$             | 593.035(593.040)             |
| $\{[\text{dTMP}^e + \text{PO}_3] + [\text{Pt}(\text{py})]\}^+$                   | $\text{C}_{20}\text{H}_{21}\text{N}_4\text{O}_8\text{PPt}$             | 672.074(672.082)             |
| $\{[\text{dTMP}^e + \text{PO}_3\text{H}] + [\text{Pt}(\text{N})(\text{py})]\}^+$ | $\text{C}_{15}\text{H}_{20}\text{N}_4\text{O}_{11}\text{P}_2\text{Pt}$ | 690.022(690.033)             |
| $\{\text{w}_1 + [\text{Pt}(\text{N}_3)(\text{py})_2]\}^+$                        | $\text{C}_{19}\text{H}_{23}\text{N}_8\text{O}_7\text{PPt}$             | 702.109(702.115)             |
| $\{\text{c}_1 + \text{T} + [\text{Pt}(\text{py})]\}^+$                           | $\text{C}_{20}\text{H}_{21}\text{N}_8\text{O}_7\text{PPt}$             | 712.097(712.099)             |

|                                                                            |                                 |                    |
|----------------------------------------------------------------------------|---------------------------------|--------------------|
| $[a_3 - C_3^c]^+$                                                          | $C_{25}H_{31}N_7O_{14}P_2$      | 716.161(716.148)   |
| $\{[a_2 - T_2^c] + [Pt(N_3)(py)]\}^+$                                      | $C_{20}H_{22}N_9O_7PPt$         | 727.105(725.110)   |
| <b>[II] - C<sup>b</sup>]</b> <sup>+</sup>                                  | $C_{25}H_{33}N_7O_{15}P_2$      | 734.154(734.158)   |
| $\{[T_2:T_2^d] + [Pt(N)(py)]\}^+$                                          | $C_{20}H_{24}N_4O_{12}P_2Pt$    | 770.053(770.059)   |
| $\{[w_2 - C^b] + [Pt(N)(py)]\}^+$                                          | $C_{20}H_{26}N_5O_{13}P_2Pt$    | 802.066(802.072)   |
| $\{[a_2 - T_2^c] + [Pt(N_3)(py)_2]\}^+$                                    | $C_{25}H_{27}N_{10}O_7PPt$      | 806.152(806.152)   |
| $\{[x_2 - C^b] + [Pt(py)_2]\}^+$ or $\{[T_2^d] + [Pt(py)_2]\}^+$           | $C_{25}H_{28}N_4O_{12}P_2Pt$    | 834.087(834.090)   |
| <b>[III]</b> <sup>+</sup>                                                  | $C_{29}H_{38}N_{10}O_{16}P_2$   | 845.191(845.202)   |
| $\{x_2 + [Pt(py)]\}^+$                                                     | $C_{24}H_{28}N_6O_{13}P_2Pt$    | 866.086(866.091)   |
| $\{[x_2 - C^b] + [Pt(N_3)(py)_2]\}^+$ or $\{[T_2^d] + [Pt(N_3)(py)_2]\}^+$ | $C_{25}H_{29}N_7O_{12}P_2Pt$    | 877.103(877.107)   |
| $\{x_2 + [Pt(N_3)(py)]\}^+$                                                | $C_{24}H_{29}N_7O_{13}P_2Pt$    | 881.099(880.102)   |
| $\{w_2 + [Pt(py)]\}^+$                                                     | $C_{24}H_{30}N_6O_{14}P_2Pt$    | 884.110(884.102)   |
| $\{c_2 + [Pt(py)]\}^+$                                                     | $C_{25}H_{28}N_8O_{12}P_2Pt$    | 890.095(890.102)   |
| $\{[w_2 - C^b] + [Pt(N_3)(py)_2]\}^+$                                      | $C_{25}H_{31}N_7O_{13}P_2Pt$    | 895.118(895.118)   |
| $\{c_2 + [Pt(N)(py)]\}^+$                                                  | $C_{25}H_{29}N_9O_{12}P_2Pt$    | 905.115(905.113)   |
| $\{d_2 + [Pt(py)]\}^+$                                                     | $C_{25}H_{30}N_8O_{13}P_2Pt$    | 908.119(908.113)   |
| $\{d_2 + [Pt(N_3)(py)]\}^+$                                                | $C_{25}H_{31}N_9O_{13}P_2Pt$    | 923.104(923.124)   |
| $\{a_2 + [Pt(N_3)(py)_2]\}^+$                                              | $C_{30}H_{33}N_{12}O_9PPt$      | 932.186(932.195)   |
| $\{w_2 + [Pt(py)_2]\}^+$                                                   | $C_{29}H_{35}N_7O_{14}P_2Pt$    | 963.135(963.144)   |
| $\{d_2 + [Pt(py)_2]\}^+$                                                   | $C_{30}H_{35}N_9O_{13}P_2Pt$    | 987.143(987.155)   |
| $\{x_2 + [Pt(N_3)(py)_2]\}^+$                                              | $C_{29}H_{34}N_{10}O_{13}P_2Pt$ | 988.135(988.150)   |
| $\{w_2 + [Pt(N_3)(py)_2]\}^+$                                              | $C_{29}H_{36}N_{10}O_{14}P_2Pt$ | 1006.165(1006.161) |
| $\{c_2 + [Pt(N_3)(py)_2]\}^+$                                              | $C_{30}H_{34}N_{12}O_{12}P_2Pt$ | 1012.151(1012.162) |
| $\{[II - H_2O] + [Pt]\}^+$                                                 | $C_{29}H_{34}N_{10}O_{15}P_2Pt$ | 1020.155(1020.140) |
| $\{d_2 + [Pt(N_3)(py)_2]\}^+$                                              | $C_{30}H_{36}N_{12}O_{13}P_2Pt$ | 1030.162(1030.172) |
| $\{[II - H_2O] + [Pt(N)]\}^+$                                              | $C_{29}H_{35}N_{11}O_{15}P_2Pt$ | 1035.151(1035.151) |
| $\{II + [Pt(N)]\}^+$                                                       | $C_{29}H_{37}N_{11}O_{16}P_2Pt$ | 1053.151(1053.162) |
| $\{[II - A^b] + [Pt(py)_2]\}^+$                                            | $C_{34}H_{41}N_7O_{16}P_2Pt$    | 1061.162(1061.181) |
| $\{[a_3 - C_3^c] + [Pt(py)_2]\}^+$                                         | $C_{35}H_{39}N_9O_{14}P_2Pt$    | 1067.182(1067.182) |

|                                                                          |                                                                           |                    |
|--------------------------------------------------------------------------|---------------------------------------------------------------------------|--------------------|
| $\{\mathbf{II} - \text{C}^b\} + [\text{Pt}(\text{py})_2]^+$              | $\text{C}_{35}\text{H}_{41}\text{N}_9\text{O}_{15}\text{P}_2\text{Pt}$    | 1085.181(1085.192) |
| $\{\mathbf{II} - \text{H}_2\text{O}\} + [\text{Pt}(\text{py})]^+$        | $\text{C}_{34}\text{H}_{39}\text{N}_{11}\text{O}_{15}\text{P}_2\text{Pt}$ | 1099.192(1099.182) |
| $\{\mathbf{II} - \text{A}^b\} + [\text{Pt}(\text{N}_3)(\text{py})_2]^+$  | $\text{C}_{34}\text{H}_{42}\text{N}_{10}\text{O}_{16}\text{P}_2\text{Pt}$ | 1104.195(1104.198) |
| $\{\text{a}_3 - \text{C}_3^c\} + [\text{Pt}(\text{N}_3)(\text{py})_2]^+$ | $\text{C}_{35}\text{H}_{40}\text{N}_{12}\text{O}_{14}\text{P}_2\text{Pt}$ | 1110.199(1110.198) |
| $\{\mathbf{II} + [\text{Pt}(\text{py})]\}^+$                             | $\text{C}_{34}\text{H}_{41}\text{N}_{11}\text{O}_{16}\text{P}_2\text{Pt}$ | 1117.198(1117.193) |
| $\{\mathbf{II} - \text{C}^b\} + [\text{Pt}(\text{N}_3)(\text{py})_2]^+$  | $\text{C}_{35}\text{H}_{42}\text{N}_{12}\text{O}_{15}\text{P}_2\text{Pt}$ | 1128.205(1128.209) |
| $\{\mathbf{II} + [\text{Pt}(\text{N}_3)(\text{py})]\}^+$                 | $\text{C}_{34}\text{H}_{42}\text{N}_{14}\text{O}_{16}\text{P}_2\text{Pt}$ | 1160.203(1160.210) |
| $\{\mathbf{II} + [\text{Pt}(\text{py})_2]\}^+$                           | $\text{C}_{39}\text{H}_{46}\text{N}_{12}\text{O}_{16}\text{P}_2\text{Pt}$ | 1196.230(1196.235) |
| $\{\mathbf{II} + [\text{Pt}(\text{N}_3)(\text{py})_2]\}^+$               | $\text{C}_{39}\text{H}_{47}\text{N}_{15}\text{O}_{16}\text{P}_2\text{Pt}$ | 1239.252(1239.252) |

<sup>a</sup>The most abundant isotopic mass-to-charge ratio.

<sup>b</sup>A and C represent the neutral loss of an adenine and a cytosine base, respectively.

<sup>c</sup>T<sub>n</sub> and C<sub>n</sub> represent the loss of a thymine and a cytosine base, respectively, followed by elimination of a H<sub>2</sub>O molecule to form a furan ring, n indicates the position of the base in strand **II**.

<sup>d</sup>The internal fragment B<sub>m</sub>:B<sub>n</sub> results from fragmentation at both the a- and w-sites, having a phosphate group at their 5'-terminus and a furan ring at the 3'-terminus.

<sup>e</sup>dTM and dTMP represent the thymidine and thymidine monophosphate, respectively.

**Table S7.** Fragment ions observed by MS/MS analysis in positive-ion mode of mono-platinated **III** ( $[\mathbf{III} + \mathbf{1}']^+$ ) produced by the reaction of complex **1** with ODN **III** at 310 K after irradiation under blue light for 1 h. (Charges for Pt moiety and the loss of protons from **III** for balancing the charges of the ions are omitted for clarity).  $\mathbf{1}' = [\text{Pt}(\text{N}_3)(\text{py})_2]^+$

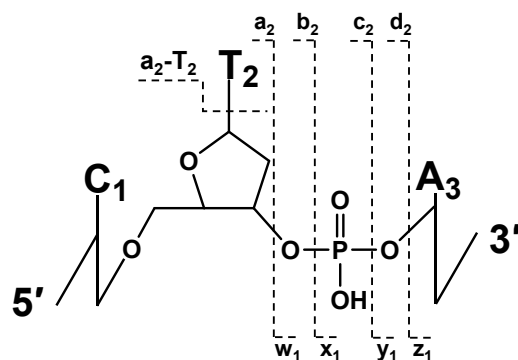

| Ions                                                                    | Formula                                                       | $m/z^a$ observed(calculated) |
|-------------------------------------------------------------------------|---------------------------------------------------------------|------------------------------|
| $[\text{C}]^+$                                                          | $\text{C}_4\text{H}_5\text{N}_3\text{O}$                      | 112.047(112.051)             |
| $[\text{A}]^+$                                                          | $\text{C}_5\text{H}_5\text{N}_5$                              | 136.056(136.062)             |
| $[\text{a}_1]^+$                                                        | $\text{C}_9\text{H}_{11}\text{N}_3\text{O}_3$                 | 210.084(210.087)             |
| $[\text{Pt}(\text{N}_3)(\text{py})]^+$                                  | $\text{C}_{10}\text{H}_9\text{N}_5\text{Pt}$                  | 395.051(395.058)             |
| $\{\text{C} + [\text{Pt}(\text{N})(\text{py})]\}^+$                     | $\text{C}_9\text{H}_9\text{N}_5\text{OPt}$                    | 399.050(399.053)             |
| $\{\text{A} + [\text{Pt}(\text{N})(\text{py})]\}^+$                     | $\text{C}_{10}\text{H}_9\text{N}_7\text{Pt}$                  | 423.048(423.064)             |
| $\{\text{C} + [\text{Pt}(\text{N}_3)(\text{py})]\}^+$                   | $\text{C}_9\text{H}_9\text{N}_7\text{OPt}$                    | 427.055(427.059)             |
| $\{[\text{C} - \text{NH}_2] + [\text{Pt}(\text{py})_2]\}^+$             | $\text{C}_{14}\text{H}_{11}\text{N}_4\text{OPt}$              | 447.066(447.065)             |
| $\{\text{A} + [\text{Pt}(\text{N}_3)(\text{py})]\}^+$                   | $\text{C}_{10}\text{H}_9\text{N}_9\text{Pt}$                  | 451.072(451.070)             |
| $\{\text{dTM}^e + [\text{Pt}(\text{N}_3)]\}^+$                          | $\text{C}_{10}\text{H}_{13}\text{N}_5\text{O}_5\text{Pt}$     | 479.079(479.064)             |
| $[\text{T}_2:\text{T}_2^{\text{d}}]^+$                                  | $\text{C}_{15}\text{H}_{20}\text{N}_2\text{O}_{12}\text{P}_2$ | 483.041(483.056)             |
| $\{\text{C} + [\text{Pt}(\text{N}_3)(\text{py})_2]\}^+$                 | $\text{C}_{14}\text{H}_{14}\text{N}_8\text{OPt}$              | 506.095(506.101)             |
| $\{\text{A} + [\text{Pt}(\text{N}_3)(\text{py})_2]\}^{2+}$              | $\text{C}_{15}\text{H}_{14}\text{N}_{10}\text{Pt}$            | 530.111(530.112)             |
| $\{[\text{dTM}^e + \text{PO}_2] + [\text{Pt}(\text{py})]\}^+$           | $\text{C}_{15}\text{H}_{16}\text{N}_3\text{O}_7\text{PPt}$    | 577.043(577.045)             |
| $\{\text{x}_1 + [\text{Pt}(\text{py})]\}^+$                             | $\text{C}_{15}\text{H}_{15}\text{N}_6\text{O}_5\text{PPt}$    | 586.052(586.056)             |
| $\{[\text{dTM}^e + \text{PO}_2] + [\text{Pt}(\text{N})(\text{py})]\}^+$ | $\text{C}_{15}\text{H}_{17}\text{N}_4\text{O}_7\text{PPt}$    | 592.042(592.056)             |



|                                                                            |                                 |                    |
|----------------------------------------------------------------------------|---------------------------------|--------------------|
| $[d_2]^+$                                                                  | $C_{20}H_{27}N_7O_{13}P_2$      | 636.118(636.121)   |
| $\{[dTMP^e + PO_3] + [Pt(py)_2]\}^+$                                       | $C_{20}H_{21}N_4O_8PPt$         | 672.083(672.082)   |
| $\{[dTMP^e + PO_3H] + [Pt(N)(py)]\}^+$                                     | $C_{15}H_{20}N_4O_{11}P_2Pt$    | 690.026(690.033)   |
| $\{c_1 + T + [Pt(py)]\}^+$                                                 | $C_{20}H_{21}N_8O_7PPt$         | 712.096(712.099)   |
| $\{w_1 + [Pt(N_3)(py)_2]\}^+$                                              | $C_{20}H_{23}N_{10}O_6PPt$      | 726.125(726.126)   |
| $[III - C^b]^+$                                                            | $C_{25}H_{33}N_7O_{15}P_2$      | 734.152(734.158)   |
| $\{[dTMP^e + PO_3H] + [Pt(py)_2]\}^+$                                      | $C_{20}H_{24}N_4O_{11}P_2Pt$    | 754.063(754.064)   |
| $\{[T_2:T_2^d] + [Pt(N)(py)]\}^+$                                          | $C_{20}H_{24}N_4O_{12}P_2Pt$    | 770.052(770.059)   |
| $\{x_2 + [Pt(N)]\}^+$                                                      | $C_{20}H_{26}N_8O_{13}P_2Pt$    | 826.076(829.071)   |
| $\{[d_2 - T^b - 2H_2O] + [Pt(N_3)(py)_2]\}^+$                              | $C_{24}H_{26}N_8O_{10}P_2Pt$    | 844.088(844.097)   |
| $\{[c_2 - C^b] + [Pt(N_3)(py)_2]\}^+$ or $\{[T_2^d] + [Pt(N_3)(py)_2]\}^+$ | $C_{25}H_{29}N_7O_{12}P_2Pt$    | 877.108(877.107)   |
| $\{c_2 + [Pt(N_3)(py)]\}^+$                                                | $C_{24}H_{29}N_7O_{13}P_2Pt$    | 881.108(880.102)   |
| $\{x_2 + [Pt(N)(py)]\}^+$                                                  | $C_{25}H_{29}N_9O_{12}P_2Pt$    | 905.108(905.113)   |
| $\{w_2 + [Pt(py)]\}^+$                                                     | $C_{25}H_{30}N_8O_{13}P_2Pt$    | 908.109(908.113)   |
| $\{w_2 + [Pt(N)(py)]\}^+$                                                  | $C_{25}H_{31}N_9O_{13}P_2Pt$    | 923.128(923.120)   |
| $\{d_2 + A + [Pt]\}^+$ or $\{w_2 + C + [Pt]\}^+$                           | $C_{24}H_{30}N_{10}O_{14}P_2Pt$ | 940.112(940.114)   |
| $\{w_2 + [Pt(N_3)(py)]\}^+$                                                | $C_{25}H_{31}N_{11}O_{13}P_2Pt$ | 951.144(951.130)   |
| $\{d_2 + [Pt(py)_2]\}^+$                                                   | $C_{29}H_{35}N_7O_{14}P_2Pt$    | 963.128(963.144)   |
| $\{[a_3 - A_3^c - C^b] + [Pt(N_3)(py)_2]\}^+$                              | $C_{30}H_{35}N_7O_{14}P_2Pt$    | 975.133(975.144)   |
| $\{w_2 + [Pt(py)_2]\}^+$                                                   | $C_{30}H_{35}N_9O_{13}P_2Pt$    | 987.146(987.155)   |
| $\{w_2 + [Pt(N)(py)_2]\}^+$                                                | $C_{30}H_{36}N_{10}O_{13}P_2Pt$ | 1002.160(1002.166) |
| $\{[III - C^b] + [Pt(py)]\}^+$                                             | $C_{30}H_{36}N_8O_{15}P_2Pt$    | 1006.152(1006.150) |
| $\{d_2 + A + [Pt(py)]\}^+$ or $\{w_2 + C + [Pt(py)]\}^+$                   | $C_{29}H_{35}N_{11}O_{14}P_2Pt$ | 1019.150(1019.156) |
| $\{[III - H_2O] + [Pt]\}^+$                                                | $C_{29}H_{34}N_{10}O_{15}P_2Pt$ | 1020.161(1020.140) |
| $\{w_2 + [Pt(N_3)(py)_2]\}^+$                                              | $C_{30}H_{36}N_{12}O_{13}P_2Pt$ | 1030.174(1030.172) |
| $\{III + [Pt(N)]\}^+$                                                      | $C_{29}H_{37}N_{11}O_{16}P_2Pt$ | 1053.157(1053.162) |
| $\{[w_2 + 2O + [Pt(N_3)(py)_2]\}^+$                                        | $C_{30}H_{36}N_{12}O_{15}P_2Pt$ | 1062.162(1062.162) |
| $\{[a_3 - A_3^c] + [Pt(N_3)(py)_2]\}^+$                                    | $C_{34}H_{40}N_{10}O_{15}P_2Pt$ | 1086.193(1086.187) |
| $\{d_2 + A + [Pt(py)_2]\}^+$ or $\{w_2 + C + [Pt(py)_2]\}^+$               | $C_{34}H_{40}N_{12}O_{14}P_2Pt$ | 1098.207(1098.198) |

|                                                                          |                                                                           |                    |
|--------------------------------------------------------------------------|---------------------------------------------------------------------------|--------------------|
| $\{\mathbf{III} - \text{A}^b\} + [\text{Pt}(\text{N}_3)(\text{py})_2]^+$ | $\text{C}_{34}\text{H}_{42}\text{N}_{10}\text{O}_{16}\text{P}_2\text{Pt}$ | 1104.208(1104.198) |
| $\{\mathbf{III} + [\text{Pt}(\text{py})]\}^+$                            | $\text{C}_{34}\text{H}_{41}\text{N}_{11}\text{O}_{16}\text{P}_2\text{Pt}$ | 1117.190(1117.193) |
| $\{\mathbf{III} - \text{C}^b\} + [\text{Pt}(\text{py})_2]^+$             | $\text{C}_{35}\text{H}_{42}\text{N}_{12}\text{O}_{15}\text{P}_2\text{Pt}$ | 1128.211(1128.209) |
| $\{\mathbf{III} + [\text{Pt}(\text{N}_3)(\text{py})]\}^+$                | $\text{C}_{34}\text{H}_{42}\text{N}_{14}\text{O}_{16}\text{P}_2\text{Pt}$ | 1160.210(1160.210) |
| $\{\mathbf{III} + [\text{Pt}(\text{py})_2]\}^+$                          | $\text{C}_{39}\text{H}_{46}\text{N}_{12}\text{O}_{16}\text{P}_2\text{Pt}$ | 1196.237(1196.235) |
| $\{\mathbf{III} + [\text{Pt}(\text{N}_3)(\text{py})_2]\}^+$              | $\text{C}_{39}\text{H}_{47}\text{N}_{15}\text{O}_{16}\text{P}_2\text{Pt}$ | 1239.252(1239.252) |

<sup>a</sup>The most abundant isotopic mass-to-charge ratio.

<sup>b</sup>A, T and C represent the neutral loss of an adenine, thymine and a cytosine base, respectively.

<sup>c</sup>T<sub>n</sub>, A<sub>n</sub> and C<sub>n</sub> represent the loss of a thymine, an adenine and a cytosine base, respectively, followed by elimination of a H<sub>2</sub>O molecule to form a furan ring, n indicates the position of the base in strand **III**.

<sup>d</sup>The internal fragment B<sub>m</sub>:B<sub>n</sub> results from fragmentation at both the a- and w-sites, having a phosphate group at their 5'-terminus and a furan ring at the 3'-terminus.

<sup>e</sup>dTM and dTMP represent the thymidine and thymidine monophosphate, respectively.

**Table S8.** Fragment ions observed by MS/MS analysis in positive-ion mode of mono-platinated **IV** ( $[\mathbf{IV} + \mathbf{1}']^+$ ) produced by the reaction of complex **1** with ODN **IV** at 310 K after irradiation under blue light for 1 h. (Charges for Pt moiety and the loss of protons from **IV** for balancing the charges of the ions are omitted for clarity).  $\mathbf{1}' = [\text{Pt}(\text{N}_3)(\text{py})_2]^+$

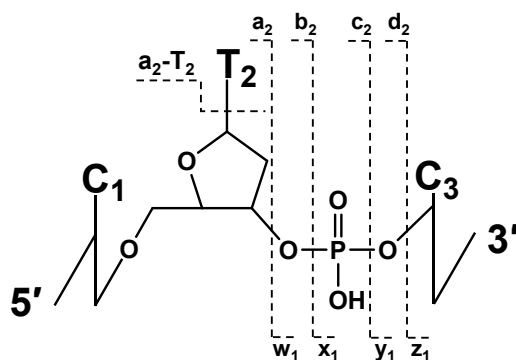

| Ions                                                                            | Formula                                                       | $m/z^a$ observed(calculated) |
|---------------------------------------------------------------------------------|---------------------------------------------------------------|------------------------------|
| $[\text{C}]^+$                                                                  | $\text{C}_4\text{H}_5\text{N}_3\text{O}$                      | 112.045(112.051)             |
| $[\text{a}_1/\text{z}_1]^+$                                                     | $\text{C}_9\text{H}_{11}\text{N}_3\text{O}_3$                 | 210.083(210.087)             |
| $\{[\text{Pt}(\text{N})(\text{py})_2]\}^+$                                      | $\text{C}_{10}\text{H}_9\text{N}_3\text{Pt}$                  | 367.034(367.052)             |
| $\{[\text{Pt}(\text{N}_3)(\text{py})_2]\}^+$                                    | $\text{C}_{10}\text{H}_9\text{N}_5\text{Pt}$                  | 395.058(395.058)             |
| $\{\text{C} + [\text{Pt}(\text{N})(\text{py})]\}^+$                             | $\text{C}_9\text{H}_9\text{N}_5\text{OPt}$                    | 399.049(399.053)             |
| $\{\text{C} + [\text{Pt}(\text{N}_3)(\text{py})]\}^+$                           | $\text{C}_9\text{H}_9\text{N}_7\text{OPt}$                    | 427.053(427.059)             |
| $\{\text{dTM}^e + [\text{Pt}(\text{N}_3)]\}^+$                                  | $\text{C}_{10}\text{H}_{13}\text{N}_5\text{O}_5\text{Pt}$     | 479.073(479.064)             |
| $\{[\text{dTM}^e - 2\text{H}_2\text{O}] + [\text{Pt}(\text{N})(\text{py})]\}^+$ | $\text{C}_{15}\text{H}_{14}\text{N}_4\text{O}_3\text{Pt}$     | 494.071(494.079)             |
| $\{\text{C} + [\text{Pt}(\text{N}_3)(\text{py})_2]\}^+$                         | $\text{C}_{14}\text{H}_{14}\text{N}_8\text{OPt}$              | 506.093(506.101)             |
| $\{\text{C} + \text{C} + [\text{Pt}(\text{N}_3)(\text{py})]\}^+$                | $\text{C}_{13}\text{H}_{14}\text{N}_{10}\text{O}_2\text{Pt}$  | 538.103(538.102)             |
| $\{\text{c}_1/\text{x}_1 + [\text{Pt}(\text{py})]\}^+$                          | $\text{C}_{14}\text{H}_{15}\text{N}_4\text{O}_6\text{PPt}$    | 562.036(562.045)             |
| $\{\text{C} + \text{C} + [\text{Pt}(\text{py})_2]\}^+$                          | $\text{C}_{18}\text{H}_{18}\text{N}_8\text{O}_2\text{Pt}$     | 574.113(574.127)             |
| $\{[\text{dTM}^e + \text{PO}_2] + [\text{Pt}(\text{py})]\}^+$                   | $\text{C}_{15}\text{H}_{16}\text{N}_3\text{O}_7\text{PPt}$    | 577.036(577.045)             |
| $\{[\text{dTM}^e + \text{PO}_3] + [\text{Pt}(\text{py})]\}^+$                   | $\text{C}_{15}\text{H}_{16}\text{N}_3\text{O}_8\text{PPt}$    | 593.036(593.040)             |
| $[\text{d}_2/\text{w}_2]^+$                                                     | $\text{C}_{19}\text{H}_{27}\text{N}_5\text{O}_{14}\text{P}_2$ | 612.100(612.110)             |
| $\{\text{b}_1/\text{y}_1 + [\text{Pt}(\text{N}_3)(\text{py})_2]\}^+$            | $\text{C}_{19}\text{H}_{22}\text{N}_8\text{O}_4\text{Pt}$     | 622.143(622.149)             |
| $\{\text{b}_2/\text{y}_2 + [\text{Pt}(\text{N}_3)]\}^+$                         | $\text{C}_{14}\text{H}_{19}\text{N}_6\text{O}_9\text{PPt}$    | 642.064(642.067)             |
| $\{[\text{dTMP}^e + \text{PO}_3] + [\text{Pt}(\text{py})_2]\}^+$                | $\text{C}_{20}\text{H}_{21}\text{N}_4\text{O}_8\text{PPt}$    | 672.075(672.082)             |

|                                               |                                 |                    |
|-----------------------------------------------|---------------------------------|--------------------|
| $\{[dTMP^e + PO_3H] + [Pt(N)(py)]\}^+$        | $C_{15}H_{20}N_4O_{11}P_2Pt$    | 690.023(690.033)   |
| $\{d_1/w_1 + [Pt(N_3)(py)_2]\}^+$             | $C_{19}H_{23}N_8O_7PPt$         | 702.105(702.115)   |
| $[IV - C^b]^+$                                | $C_{24}H_{33}N_5O_{16}P_2$      | 710.143(710.147)   |
| $\{[T_2:T_2^d] + [Pt(py)]\}^+$                | $C_{20}H_{23}N_3O_{12}P_2Pt$    | 755.056(755.048)   |
| $\{[T_2:T_2^d] + [Pt(N)(py)]\}^+$             | $C_{20}H_{24}N_4O_{12}P_2Pt$    | 770.054(770.059)   |
| $\{[c_2/x_2] + [Pt]\}^+$                      | $C_{24}H_{28}N_6O_{13}P_2Pt$    | 788.061(788.049)   |
| $\{[c_2/x_2] + [Pt(N)]\}^+$                   | $C_{24}H_{29}N_7O_{13}P_2Pt$    | 802.059(802.060)   |
| $\{[d_2/w_2] + [Pt(N)]\}^+$                   | $C_{19}H_{26}N_6O_{14}P_2Pt$    | 820.070(820.070)   |
| $\{[T_2:T_2^d] + [Pt(py)_2]\}^+$              | $C_{25}H_{28}N_4O_{12}P_2Pt$    | 834.088(834.090)   |
| $\{[T_2:T_2^d] + [Pt(N)(py)_2]\}^+$           | $C_{25}H_{29}N_5O_{12}P_2Pt$    | 849.102(849.101)   |
| $\{[c_2/x_2] + [Pt(py)]\}^+$                  | $C_{29}H_{33}N_7O_{13}P_2Pt$    | 866.088(866.091)   |
| $\{[T_2^d] + [Pt(N_3)(py)_2]\}^+$             | $C_{25}H_{29}N_7O_{12}P_2Pt$    | 877.104(877.107)   |
| $\{[d_2/w_2] + [Pt(py)]\}^+$                  | $C_{24}H_{30}N_6O_{14}P_2Pt$    | 884.100(884.102)   |
| $\{[a_3 - C_3^c - H_2O] + [Pt(N_3)]\}^+$      | $C_{24}H_{29}N_8O_{13}P_2Pt$    | 895.114(895.105)   |
| $\{[d_2/w_2] + [Pt(N)(py)]\}^+$               | $C_{24}H_{31}N_7O_{14}P_2Pt$    | 899.107(899.113)   |
| $\{a_2 + [Pt(N_3)(py)_2]\}^+$                 | $C_{29}H_{33}N_{10}O_{10}PPt$   | 908.181(908.184)   |
| $\{d_2/w_2 + C + [Pt]\}^+$                    | $C_{23}H_{30}N_8O_{15}P_2Pt$    | 916.099(916.103)   |
| $\{[c_2/x_2 - H_2O] + [Pt(py)_2]\}^+$         | $C_{29}H_{31}N_7O_{12}P_2Pt$    | 927.117(927.123)   |
| $\{[IV - T^b] + [Pt(py)_2]\}^+$               | $C_{23}H_{31}N_9O_{15}P_2Pt$    | 931.113(931.114)   |
| $\{[c_2/x_2] + [Pt(py)_2]\}^+$                | $C_{29}H_{33}N_7O_{13}P_2Pt$    | 945.113(945.133)   |
| $\{[d_2/w_2] + [Pt(py)_2]\}^+$                | $C_{29}H_{35}N_7O_{14}P_2Pt$    | 963.137(963.144)   |
| $\{[a_3 - C_3^c - C^b] + [Pt(N_3)(py)_2]\}^+$ | $C_{30}H_{35}N_7O_{14}P_2Pt$    | 975.136(975.144)   |
| $\{[d_2/w_2] + [Pt(N_3)(py)_2]\}^+$           | $C_{29}H_{36}N_{10}O_{14}P_2Pt$ | 1006.161(1006.161) |
| $\{[a_3 - C_3^c] + [Pt(py)_2]\}^+$            | $C_{34}H_{39}N_7O_{15}P_2Pt$    | 1043.167(1043.170) |
| $\{[IV - C^b] + [Pt(py)_2]\}^+$               | $C_{34}H_{41}N_7O_{16}P_2Pt$    | 1061.184(1061.181) |
| $\{[IV - H_2O] + [Pt(py)]\}^+$                | $C_{33}H_{39}N_9O_{16}P_2Pt$    | 1075.187(1075.171) |
| $\{[a_3 - C_3^c] + [Pt(N_3)(py)_2]\}^+$       | $C_{34}H_{40}N_{10}O_{15}P_2Pt$ | 1086.182(1086.187) |
| $\{IV + [Pt(py)]\}^+$                         | $C_{33}H_{41}N_9O_{17}P_2Pt$    | 1093.179(1093.182) |
| $\{[IV - C^b] + [Pt(N_3)(py)_2]\}^+$          | $C_{34}H_{42}N_{10}O_{16}P_2Pt$ | 1104.197(1104.198) |
| $\{IV + [Pt(N_3)(py)]\}^+$                    | $C_{33}H_{42}N_{12}O_{17}P_2Pt$ | 1136.194(1136.199) |

|                                                            |                                                                           |                    |
|------------------------------------------------------------|---------------------------------------------------------------------------|--------------------|
| $\{\mathbf{IV} + [\text{Pt}(\text{py})_2]\}^+$             | $\text{C}_{38}\text{H}_{46}\text{N}_{10}\text{O}_{17}\text{P}_2\text{Pt}$ | 1172.221(1172.224) |
| $\{\mathbf{IV} + [\text{Pt}(\text{N}_3)(\text{py})_2]\}^+$ | $\text{C}_{38}\text{H}_{47}\text{N}_{13}\text{O}_{17}\text{P}_2\text{Pt}$ | 1215.241(1215.241) |

---

<sup>a</sup>The most abundant isotopic mass-to-charge ratio.

<sup>b</sup>T and C represent the neutral loss of a thymine and a cytosine base, respectively.

<sup>c</sup>T<sub>n</sub> and C<sub>n</sub> represent the loss of a thymine and a cytosine base, respectively, followed by elimination of a H<sub>2</sub>O molecule to form a furan ring, n indicates the position of the base in strand **IV**.

<sup>d</sup>The internal fragment B<sub>m</sub>:B<sub>n</sub> results from fragmentation at both the a- and w-sites, having a phosphate group at their 5'-terminus and a furan ring at the 3'-terminus.

<sup>e</sup>dTM and dTMP represent the thymidine and thymidine monophosphate, respectively.

**Table S9.** Fragment ions observed by MS/MS analysis in positive-ion mode of mono-platinated **I** ( $[\mathbf{I} + \mathbf{1}'']^+$ ) produced by the reaction of complex **1** with ODN **I** at 310 K after irradiation under blue light for 1 h. (Charges for Pt moiety and the loss of protons from **I** for balancing the charges of the ions are omitted for clarity).  $\mathbf{1}'' = [\text{Pt}(\text{py})_2]^{2+}$



| Ions                                                                          | Formula                                                                | $m/z^a$ observed(calculated) |
|-------------------------------------------------------------------------------|------------------------------------------------------------------------|------------------------------|
| $[\text{A}]^+$                                                                | $\text{C}_5\text{H}_5\text{N}_5$                                       | 136.058(136.062)             |
| $\{\text{A} + [\text{Pt}(\text{py})]\}^+$                                     | $\text{C}_{10}\text{H}_8\text{N}_6\text{Pt}$                           | 408.029(408.053)             |
| $\{\text{A} + [\text{Pt}(\text{py})_2]\}^+$                                   | $\text{C}_{15}\text{H}_{13}\text{N}_7\text{Pt}$                        | 487.071(487.095)             |
| $\{\text{A} + \text{T} + [\text{Pt}(\text{py})]\}^+$                          | $\text{C}_{15}\text{H}_{14}\text{N}_8\text{O}_2\text{Pt}$              | 534.090(534.096)             |
| $\{\text{A} + \text{A} + [\text{Pt}(\text{py})]\}^+$                          | $\text{C}_{15}\text{H}_{13}\text{N}_{11}\text{Pt}$                     | 543.102(543.108)             |
| $\{\text{c}_1/\text{x}_1 + [\text{Pt}(\text{py})]\}^+$                        | $\text{C}_{15}\text{H}_{15}\text{N}_6\text{O}_5\text{PPt}$             | 586.059(586.056)             |
| $\{\text{A} + \text{A} + [\text{Pt}(\text{py})_2]\}^+$                        | $\text{C}_{20}\text{H}_{18}\text{N}_{12}\text{Pt}$                     | 622.148(622.150)             |
| $\{\text{d}_2/\text{w}_2\}^+$                                                 | $\text{C}_{20}\text{H}_{27}\text{N}_7\text{O}_{13}\text{P}_2$          | 636.120(636.121)             |
| $\{\text{c}_1/\text{x}_1 + \text{T} + [\text{Pt}(\text{py})]\}^+$             | $\text{C}_{20}\text{H}_{21}\text{N}_8\text{O}_7\text{PPt}$             | 712.098(712.099)             |
| $\{\text{d}_1/\text{w}_1 + \text{T} + [\text{Pt}(\text{py})]\}^+$             | $\text{C}_{20}\text{H}_{23}\text{N}_8\text{O}_8\text{PPt}$             | 730.098(730.110)             |
| $[\mathbf{I} - \text{A}^b]^+$                                                 | $\text{C}_{25}\text{H}_{33}\text{N}_7\text{O}_{15}\text{P}_2$          | 734.161(734.158)             |
| $\{\text{d}_1/\text{w}_1 + \text{A} + [\text{Pt}(\text{py})]\}^+$             | $\text{C}_{20}\text{H}_{22}\text{N}_{11}\text{O}_6\text{PPt}$          | 739.113(739.121)             |
| $\{[\text{T}_2:\text{T}_2^c] + [\text{Pt}(\text{py})]\}^+$                    | $\text{C}_{20}\text{H}_{23}\text{N}_3\text{O}_{12}\text{P}_2\text{Pt}$ | 755.050(755.048)             |
| $\{[\text{a}_2/\text{z}_2 - \text{H}_2\text{O}] + [\text{Pt}(\text{py})]\}^+$ | $\text{C}_{25}\text{H}_{25}\text{N}_8\text{O}_8\text{PPt}$             | 792.131(792.126)             |
| $[\mathbf{I}]^+$                                                              | $\text{C}_{30}\text{H}_{38}\text{N}_{12}\text{O}_{15}\text{P}_2$       | 869.207(869.213)             |
| $\{\text{c}_2/\text{x}_2 + [\text{Pt}(\text{py})]\}^+$                        | $\text{C}_{25}\text{H}_{28}\text{N}_8\text{O}_{12}\text{P}_2\text{Pt}$ | 890.103(890.102)             |
| $\{\text{w}_2 + [\text{Pt}(\text{py})]\}^+$                                   | $\text{C}_{25}\text{H}_{30}\text{N}_8\text{O}_{13}\text{P}_2\text{Pt}$ | 908.115(908.113)             |
| $\{\text{a}_2/\text{z}_2 + \text{A} + [\text{Pt}(\text{py})]\}^+$             | $\text{C}_{30}\text{H}_{32}\text{N}_{13}\text{O}_9\text{PPt}$          | 945.203(945.191)             |

|                                |                                 |                    |
|--------------------------------|---------------------------------|--------------------|
| $\{w_2 + A + [Pt]\}^+$         | $C_{25}H_{30}N_{12}O_{13}P_2Pt$ | 964.130(964.125)   |
| $\{w_2 + [Pt(py)_2]\}^+$       | $C_{30}H_{35}N_9O_{13}P_2Pt$    | 987.153(987.155)   |
| $\{[I - A^b] + [Pt(py)]\}^+$   | $C_{30}H_{36}N_8O_{15}P_2Pt$    | 1006.155(1006.150) |
| $\{c_2/x_2 + A + [Pt(py)]\}^+$ | $C_{30}H_{33}N_{13}O_{12}P_2Pt$ | 1025.175(1025.157) |
| $\{w_2 + A + [Pt(py)]\}^+$     | $C_{30}H_{35}N_{13}O_{13}P_2Pt$ | 1043.176(1043.167) |
| $\{I + [Pt]\}^+$               | $C_{30}H_{36}N_{12}O_{15}P_2Pt$ | 1062.167(1062.162) |
| $\{w_2 + A + [Pt(py)_2]\}^+$   | $C_{35}H_{40}N_{14}O_{13}P_2Pt$ | 1122.204(1122.210) |
| $\{[I - H_2O] + [Pt(py)]\}^+$  | $C_{35}H_{39}N_{13}O_{14}P_2Pt$ | 1123.199(1123.194) |
| $\{I + [Pt(py)]\}^+$           | $C_{35}H_{41}N_{13}O_{15}P_2Pt$ | 1141.213(1141.204) |
| $\{I + [Pt(py)_2]\}^+$         | $C_{40}H_{46}N_{14}O_{15}P_2Pt$ | 1220.246(1220.246) |

<sup>a</sup>The most abundant isotopic mass-to-charge ratio.

<sup>b</sup>A represent the neutral loss of an adenine.

<sup>c</sup>The internal fragment  $B_m:B_n$  results from fragmentation at both the a- and w-sites, having a phosphate group at their 5'-terminus and a furan ring at the 3'-terminus.

**Table S10.** Fragment ions observed by MS/MS analysis in positive-ion mode of mono-platinated **II** ( $[\mathbf{II} + \mathbf{1}'']^+$ ) produced by the reaction of complex **1** with ODN **II** at 310 K after irradiation under blue light for 1 h. (Charges for Pt moiety and the loss of protons from **II** for balancing the charges of the ions are omitted for clarity).  $\mathbf{1}'' = [\text{Pt}(\text{py})_2]^{2+}$

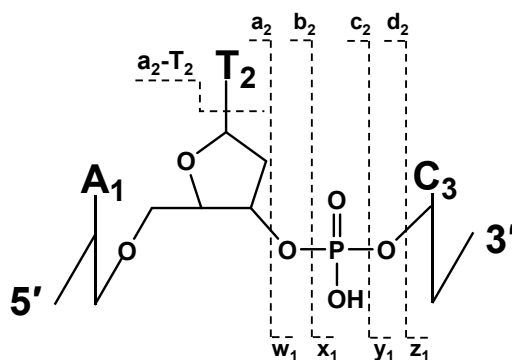

| Ions                                                         | Formula                                                                   | $m/z^a$ observed(calculated) |
|--------------------------------------------------------------|---------------------------------------------------------------------------|------------------------------|
| $[\text{C}]^+$                                               | $\text{C}_4\text{H}_5\text{N}_3\text{O}$                                  | 112.045(112.051)             |
| $[\text{A}]^+$                                               | $\text{C}_5\text{H}_5\text{N}_5$                                          | 136.060(136.062)             |
| $\{\text{A} + \text{C} + [\text{Pt}(\text{py})]\}^+$         | $\text{C}_{14}\text{H}_{13}\text{N}_9\text{OPt}$                          | 519.091(519.096)             |
| $\{\text{A} + \text{C} + [\text{Pt}(\text{py})_2]\}^+$       | $\text{C}_{19}\text{H}_{18}\text{N}_{10}\text{OPt}$                       | 598.131(598.139)             |
| $[\mathbf{II} - \text{C}^b]^+$                               | $\text{C}_{25}\text{H}_{33}\text{N}_7\text{O}_{15}\text{P}_2$             | 734.151(734.158)             |
| $\{[\text{T}_2:\text{T}_2^d] + [\text{Pt}(\text{py})]\}^+$   | $\text{C}_{20}\text{H}_{23}\text{N}_3\text{O}_{12}\text{P}_2\text{Pt}$    | 755.046(755.048)             |
| $\{\text{c}_2 + [\text{Pt}]\}^+$                             | $\text{C}_{20}\text{H}_{23}\text{N}_7\text{O}_{12}\text{P}_2\text{Pt}$    | 811.077(811.060)             |
| $[\mathbf{III}]^+$                                           | $\text{C}_{29}\text{H}_{38}\text{N}_{10}\text{O}_{16}\text{P}_2$          | 845.212(845.202)             |
| $\{\text{x}_2 + [\text{Pt}(\text{py})]\}^+$                  | $\text{C}_{24}\text{H}_{28}\text{N}_6\text{O}_{13}\text{P}_2\text{Pt}$    | 866.096(866.091)             |
| $\{\text{w}_2 + [\text{Pt}(\text{py})]\}^+$                  | $\text{C}_{24}\text{H}_{30}\text{N}_6\text{O}_{14}\text{P}_2\text{Pt}$    | 884.096(884.102)             |
| $\{\text{c}_2 + [\text{Pt}(\text{py})]\}^+$                  | $\text{C}_{25}\text{H}_{28}\text{N}_8\text{O}_{12}\text{P}_2\text{Pt}$    | 890.098(890.102)             |
| $\{[\text{a}_3 - \text{C}_3^c] + [\text{Pt}]\}^+$            | $\text{C}_{25}\text{H}_{29}\text{N}_7\text{O}_{14}\text{P}_2\text{Pt}$    | 908.098(908.097)             |
| $\{\text{a}_2 + \text{C} + [\text{Pt}(\text{py})]\}^+$       | $\text{C}_{29}\text{H}_{32}\text{N}_{11}\text{O}_{10}\text{PPt}$          | 921.185(921.179)             |
| $\{\text{w}_2 + \text{A} + [\text{Pt}]\}^+$                  | $\text{C}_{24}\text{H}_{30}\text{N}_{10}\text{O}_{14}\text{P}_2\text{Pt}$ | 939.103(939.114)             |
| $\{[\mathbf{II} - \text{A}^b] + [\text{Pt}(\text{py})]\}^+$  | $\text{C}_{29}\text{H}_{36}\text{N}_6\text{O}_{16}\text{P}_2\text{Pt}$    | 982.135(982.139)             |
| $\{[\text{a}_3 - \text{C}_3^c] + [\text{Pt}(\text{py})]\}^+$ | $\text{C}_{30}\text{H}_{34}\text{N}_8\text{O}_{14}\text{P}_2\text{Pt}$    | 988.139(988.139)             |



|                                                          |                                 |                    |
|----------------------------------------------------------|---------------------------------|--------------------|
| $\{x_2 + A + [Pt(py)]\}^+$ or $\{c_2 + C + [Pt(py)]\}^+$ | $C_{29}H_{33}N_{11}O_{13}P_2Pt$ | 1001.140(1001.146) |
| $\{[II - C^b] + [Pt(py)]\}^+$                            | $C_{30}H_{36}N_8O_{15}P_2Pt$    | 1006.156(1006.150) |
| $\{w_2 + A + [Pt(py)]\}^+$                               | $C_{29}H_{35}N_{11}O_{14}P_2Pt$ | 1019.145(1019.156) |
| $\{[II - C^b] + [Pt(py)_2]\}^+$                          | $C_{35}H_{41}N_9O_{15}P_2Pt$    | 1085.185(1085.192) |
| $\{[II - H_2O] + [Pt(py)]\}^+$                           | $C_{34}H_{39}N_{11}O_{15}P_2Pt$ | 1099.189(1099.182) |
| $\{II + [Pt(py)]\}^+$                                    | $C_{34}H_{41}N_{11}O_{16}P_2Pt$ | 1117.195(1117.193) |
| $\{II + [Pt(py)_2]\}^+$                                  | $C_{39}H_{46}N_{12}O_{16}P_2Pt$ | 1196.235(1196.235) |

<sup>a</sup>The most abundant isotopic mass-to-charge ratio.

<sup>b</sup>A and C represent the neutral loss of an adenine and a cytosine base, respectively.

<sup>c</sup> $C_n$  represent the loss of a cytosine base followed by elimination of a  $H_2O$  molecule to form a furan ring, n indicates the position of the base in strand **II**.

<sup>d</sup>The internal fragment  $B_m \cdot B_n$  results from fragmentation at both the a- and w-sites, having a phosphate group at their 5'-terminus and a furan ring at the 3'-terminus.

**Table S11.** Fragment ions observed by MS/MS analysis in positive-ion mode of mono-platinated **III** ( $[\mathbf{III} + \mathbf{1}'']^+$ ) produced by the reaction of complex **1** with ODN **III** at 310 K after irradiation under blue light for 1 h. (Charges for Pt moiety and the loss of protons from **III** for balancing the charges of the ions are omitted for clarity).  $\mathbf{1}'' = [\text{Pt}(\text{py})_2]^+$

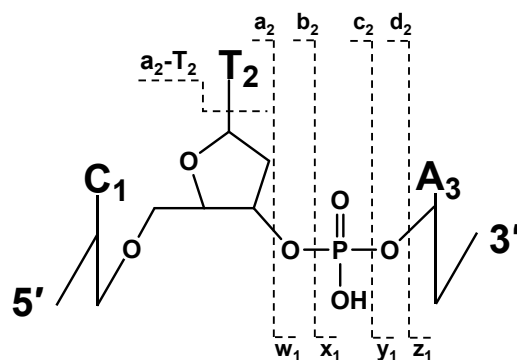

| Ions                                                               | Formula                                                                | $m/z^a$ observed(calculated) |
|--------------------------------------------------------------------|------------------------------------------------------------------------|------------------------------|
| $[\text{C}]^+$                                                     | $\text{C}_4\text{H}_5\text{N}_3\text{O}$                               | 112.047(112.051)             |
| $[\text{A}]^+$                                                     | $\text{C}_5\text{H}_5\text{N}_5$                                       | 136.056(136.062)             |
| $[\text{a}_1]^+$                                                   | $\text{C}_9\text{H}_{11}\text{N}_3\text{O}_3$                          | 210.082(210.087)             |
| $[\text{T}_2:\text{T}_2^c]^+$                                      | $\text{C}_{15}\text{H}_{20}\text{N}_2\text{O}_{12}\text{P}_2$          | 483.042(483.056)             |
| $\{\text{a}_1 + [\text{Pt}(\text{py})]\}^+$                        | $\text{C}_{15}\text{H}_{14}\text{N}_6\text{O}_2\text{Pt}$              | 506.087(506.090)             |
| $\{\text{A} + \text{C} + [\text{Pt}(\text{py})]\}^+$               | $\text{C}_{14}\text{H}_{13}\text{N}_9\text{OPt}$                       | 519.083(519.096)             |
| $\{\text{A} + \text{T} + [\text{Pt}(\text{py})]\}^+$               | $\text{C}_{15}\text{H}_{14}\text{N}_8\text{O}_2\text{Pt}$              | 534.094(534.096)             |
| $\{\text{A} + \text{C} + [\text{Pt}(\text{py})_2]\}^+$             | $\text{C}_{19}\text{H}_{18}\text{N}_{10}\text{OPt}$                    | 598.122(598.139)             |
| $[\text{d}_2]^+$                                                   | $\text{C}_{20}\text{H}_{27}\text{N}_7\text{O}_{13}\text{P}_2$          | 636.118(636.121)             |
| $\{\text{c}_1 + \text{T} + [\text{Pt}(\text{py})]\}^+$             | $\text{C}_{20}\text{H}_{21}\text{N}_8\text{O}_7\text{PPt}$             | 712.101(712.099)             |
| $\{\text{w}_1 + \text{T} + [\text{Pt}(\text{py})]\}^+$             | $\text{C}_{20}\text{H}_{23}\text{N}_8\text{O}_8\text{PPt}$             | 730.101(730.110)             |
| $[\mathbf{III} - \text{A}^b]^+$                                    | $\text{C}_{25}\text{H}_{33}\text{N}_7\text{O}_{15}\text{P}_2$          | 734.147(734.158)             |
| $\{[\text{T}_2:\text{T}_2^c] + [\text{Pt}(\text{py})]\}^+$         | $\text{C}_{20}\text{H}_{23}\text{N}_3\text{O}_{12}\text{P}_2\text{Pt}$ | 755.053(755.048)             |
| $\{[\text{z}_2 - \text{H}_2\text{O}] + [\text{Pt}(\text{py})]\}^+$ | $\text{C}_{25}\text{H}_{25}\text{N}_8\text{O}_8\text{PPt}$             | 792.122(792.126)             |
| $\{\text{x}_2 + [\text{Pt}]\}^+$                                   | $\text{C}_{20}\text{H}_{23}\text{N}_7\text{O}_{12}\text{P}_2\text{Pt}$ | 811.060(811.060)             |
| $[\mathbf{III}]^+$                                                 | $\text{C}_{29}\text{H}_{38}\text{N}_{10}\text{O}_{16}\text{P}_2$       | 845.195(845.202)             |

|                                  |                                 |                    |
|----------------------------------|---------------------------------|--------------------|
| $\{c_2 + [Pt(py)]\}^+$           | $C_{24}H_{28}N_6O_{13}P_2Pt$    | 866.079(866.091)   |
| $\{x_2 + [Pt(py)]\}^+$           | $C_{25}H_{28}N_8O_{12}P_2Pt$    | 890.099(890.102)   |
| $\{w_2 + [Pt(py)]\}^+$           | $C_{25}H_{30}N_8O_{13}P_2Pt$    | 908.105(908.113)   |
| $\{w_2 + C + [Pt]\}^+$           | $C_{24}H_{30}N_{10}O_{14}P_2Pt$ | 940.117(940.114)   |
| $\{w_2 + A + [Pt]\}^+$           | $C_{25}H_{30}N_{12}O_{13}P_2Pt$ | 964.138(964.125)   |
| $\{w_2 + [Pt(py)_2]\}^+$         | $C_{30}H_{35}N_9O_{13}P_2Pt$    | 987.148(987.155)   |
| $\{[III - C^b] + [Pt(py)]\}^+$   | $C_{30}H_{36}N_8O_{15}P_2Pt$    | 1006.144(1006.150) |
| $\{w_2 + C + [Pt(py)]\}^+$       | $C_{29}H_{35}N_{11}O_{14}P_2Pt$ | 1019.153(1019.156) |
| $\{III + [Pt]\}^+$               | $C_{29}H_{36}N_{10}O_{16}P_2Pt$ | 1038.149(1038.151) |
| $\{[III - C^b] + [Pt(py)_2]\}^+$ | $C_{35}H_{41}N_9O_{15}P_2Pt$    | 1085.193(1085.192) |
| $\{w_2 + C + [Pt(py)_2]\}^+$     | $C_{34}H_{40}N_{12}O_{14}P_2Pt$ | 1098.185(1098.198) |
| $\{[III - H_2O] + [Pt(py)]\}^+$  | $C_{34}H_{39}N_{11}O_{15}P_2Pt$ | 1099.183(1099.182) |
| $\{III + [Pt(py)]\}^+$           | $C_{34}H_{41}N_{11}O_{16}P_2Pt$ | 1117.189(1117.193) |
| $\{III + [Pt(py)_2]\}^+$         | $C_{39}H_{46}N_{12}O_{16}P_2Pt$ | 1196.235(1196.235) |

<sup>a</sup>The most abundant isotopic mass-to-charge ratio.

<sup>b</sup>A and C represent the neutral loss of an adenine and a cytosine base, respectively.

<sup>c</sup>The internal fragment  $B_m \cdot B_n$  results from fragmentation at both the a- and w-sites, having a phosphate group at their 5'-terminus and a furan ring at the 3'-terminus.

**Table S12.** Fragment ions observed by MS/MS analysis in positive-ion mode of mono-platinated **IV** ( $[\mathbf{IV} + \mathbf{1}'']^+$ ) produced by the reaction of complex **1** with ODN **IV** at 310 K after irradiation under blue light for 1 h. (Charges for Pt moiety and the loss of protons from **IV** for balancing the charges of the ions are omitted for clarity).  $\mathbf{1}'' = [\text{Pt}(\text{py})_2]^+$

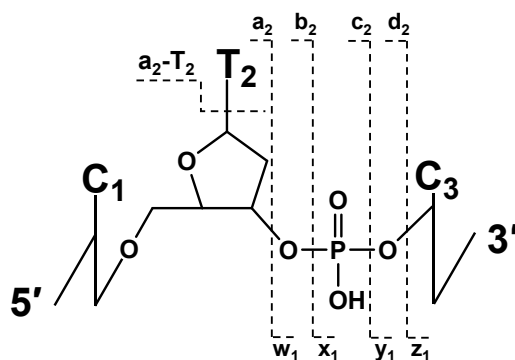

| Ions                                                        | Formula                                                                | $m/z^a$ observed(calculated) |
|-------------------------------------------------------------|------------------------------------------------------------------------|------------------------------|
| $[\text{C}]^+$                                              | $\text{C}_4\text{H}_5\text{N}_3\text{O}$                               | 112.044(112.051)             |
| $[\text{a}_1/\text{z}_1]^+$                                 | $\text{C}_9\text{H}_{11}\text{N}_3\text{O}_3$                          | 210.079(210.087)             |
| $\{\text{C} + \text{C} + [\text{Pt}]\}^+$                   | $\text{C}_8\text{H}_8\text{N}_6\text{O}_2\text{Pt}$                    | 416.031(416.043)             |
| $[\text{T}_2:\text{T}_2^c]^+$                               | $\text{C}_{15}\text{H}_{20}\text{N}_2\text{O}_{12}\text{P}_2$          | 483.047(483.056)             |
| $\{\text{C} + \text{C} + [\text{Pt}(\text{py})]\}^+$        | $\text{C}_{13}\text{H}_{13}\text{N}_7\text{O}_2\text{Pt}$              | 495.076(495.085)             |
| $\{\text{C} + \text{C} + [\text{Pt}(\text{py})_2]\}^+$      | $\text{C}_{18}\text{H}_{18}\text{N}_8\text{O}_2\text{Pt}$              | 574.116(574.127)             |
| $[\text{d}_2/\text{w}_2]^+$                                 | $\text{C}_{19}\text{H}_{27}\text{N}_5\text{O}_{14}\text{P}_2$          | 612.103(612.110)             |
| $[\mathbf{IV} - \text{C}^b]^+$                              | $\text{C}_{24}\text{H}_{33}\text{N}_5\text{O}_{16}\text{P}_2$          | 710.135(710.147)             |
| $\{\text{c}_2/\text{x}_2 + [\text{Pt}]\}^+$                 | $\text{C}_{19}\text{H}_{23}\text{N}_5\text{O}_{13}\text{P}_2\text{Pt}$ | 787.059(786.049)             |
| $[\mathbf{IV}]^+$                                           | $\text{C}_{28}\text{H}_{38}\text{N}_8\text{O}_{17}\text{P}_2$          | 821.182(821.190)             |
| $\{\text{c}_2/\text{x}_2 + [\text{Pt}(\text{py})]\}^+$      | $\text{C}_{24}\text{H}_{28}\text{N}_6\text{O}_{13}\text{P}_2\text{Pt}$ | 866.091(866.091)             |
| $\{\text{w}_2 + [\text{Pt}(\text{py})]\}^+$                 | $\text{C}_{24}\text{H}_{30}\text{N}_6\text{O}_{14}\text{P}_2\text{Pt}$ | 884.091(884.102)             |
| $\{\text{w}_2 + \text{C} + [\text{Pt}]\}^+$                 | $\text{C}_{23}\text{H}_{30}\text{N}_8\text{O}_{15}\text{P}_2\text{Pt}$ | 916.096(916.103)             |
| $\{\text{w}_2 + [\text{Pt}(\text{py})_2]\}^+$               | $\text{C}_{29}\text{H}_{35}\text{N}_7\text{O}_{14}\text{P}_2\text{Pt}$ | 963.134(963.144)             |
| $\{[\mathbf{IV} - \text{C}^b] + [\text{Pt}(\text{py})]\}^+$ | $\text{C}_{29}\text{H}_{36}\text{N}_6\text{O}_{16}\text{P}_2\text{Pt}$ | 982.142(982.139)             |
| $\{\text{w}_2 + \text{C} + [\text{Pt}(\text{py})]\}^+$      | $\text{C}_{28}\text{H}_{35}\text{N}_9\text{O}_{15}\text{P}_2\text{Pt}$ | 995.131(995.145)             |
| $\{[\mathbf{IV} - \text{H}_2\text{O}] + [\text{Pt}]\}^+$    | $\text{C}_{28}\text{H}_{34}\text{N}_8\text{O}_{16}\text{P}_2\text{Pt}$ | 996.133(996.129)             |
| $\{\mathbf{IV} + [\text{Pt}]\}^+$                           | $\text{C}_{28}\text{H}_{36}\text{N}_8\text{O}_{17}\text{P}_2\text{Pt}$ | 1014.131(1014.140)           |

|                                                                      |                                                                           |                    |
|----------------------------------------------------------------------|---------------------------------------------------------------------------|--------------------|
| $\{\mathbf{IV} - \text{C}^{\text{b}}\} + [\text{Pt}(\text{py})_2]^+$ | $\text{C}_{34}\text{H}_{41}\text{N}_7\text{O}_{16}\text{P}_2\text{Pt}$    | 1061.174(1061.181) |
| $\{\text{w}_2 + \text{C} + [\text{Pt}(\text{py})_2]^+\}$             | $\text{C}_{33}\text{H}_{40}\text{N}_{10}\text{O}_{15}\text{P}_2\text{Pt}$ | 1074.157(1074.187) |
| $\{\mathbf{IV} - \text{H}_2\text{O}\} + [\text{Pt}(\text{py})]^+$    | $\text{C}_{33}\text{H}_{39}\text{N}_9\text{O}_{16}\text{P}_2\text{Pt}$    | 1075.170(1075.171) |
| $\{\mathbf{IV} + [\text{Pt}(\text{py})]^+\}$                         | $\text{C}_{33}\text{H}_{41}\text{N}_9\text{O}_{17}\text{P}_2\text{Pt}$    | 1093.176(1093.182) |
| $\{\mathbf{IV} + [\text{Pt}(\text{py})_2]^+\}$                       | $\text{C}_{38}\text{H}_{46}\text{N}_{10}\text{O}_{17}\text{P}_2\text{Pt}$ | 1172.224(1172.224) |

---

<sup>a</sup>The most abundant isotopic mass-to-charge ratio.

<sup>b</sup>T and C represent the neutral loss of a thymine and a cytosine base, respectively.

<sup>c</sup>The internal fragment  $\text{B}_m\text{:B}_n$  results from fragmentation at both the a- and w-sites, having a phosphate group at their 5'-terminus and a furan ring at the 3'-terminus.
